# Supplementary material for: CCN concentration and INP-relevant aerosol profiles in the Saharan Air Layer over Barbados from polarization lidar and airborne in situ measurements
Source: Copernicus journal article supplement (doi:10.5194/acp-2019-466), 2019-05-21
Supplement: Supplementary file [file acp-2019-466-AC1-supplement.pdf]

## Author's final response to the reviewer comments

We want to thank the two anonymous reviewers and Paul DeMott for their time and effort spend to improve the manuscript. Their helpful comments are incorporated into the paper and will be addressed in more detail below. The main changes mostly motivated by the comment of the reviewers in the manuscript are:

- The title has been changed to: “Profiles of cloud condensation nuclei, dust mass concentration, and INP-relevant aerosol properties in the Saharan Air Layer over Barbados from polarization lidar and airborne in situ measurements”
- The introduction of the McCluskey et al. (2018) parameterization for marine aerosol.
- The addition of the recently published Harrison et al. (2019) parameterization for dust particles (K-feldspar with 1% contribution to the dust surface area).
- The use of the DeMott et al. (2010) was modified to use it for all aerosol (and not as a non-dust parameterization).
- A new subsection 5.1 was added to present a pure marine case from the SALTRACE-2 winter campaign to show unperturbed conditions.

The referee's comments are shown in *italic* and our responses are added in **bold**. The manuscript with our changes marked in bold is attached.

## Reply to Anonymous Referee 2

### **General Comments**

*This paper describes the use of lidar measurements to retrieve profiles of CCN and IN in the Saharan Air Layer over Barbados. It continues the series of paper published by this group that describe the use of these lidar measurements to retrieve particle properties using lidar measurements and to use these measurements to estimate CCN and IN. The paper compares the lidar retrievals with airborne in situ measurements provides to give some indication of how well these lidar retrievals work. Although the lidar retrieval of CCN has large uncertainty, it still provides some utility for estimating the vertical distribution of CCN. I suggest publication after the authors address the minor comments below.*

*On page 3 and elsewhere, the authors mention the use of appropriate extinction-to-backscatter values for dust, marine aerosol, and continental aerosol. It looks like these specific values are then used to convert backscatter to extinction for use in the retrieval algorithms. However, it's not clear why these specific values are used when the Raman lidar measurements actually provide the means to directly measure aerosol extinction (as well as the extinction-to-backscatter ratio). Why not use the actual Raman lidar measurements rather than these specific values? Is the SNR too low to directly retrieve these parameters during the daytime?*

**Let us explain the used process in more detail:**

**The separation of the different aerosol types is done for the particle backscatter coefficient using the particle depolarization ratio measurement. Then, we have to convert the backscatter coefficient to an extinction coefficient using the lidar ratio (based on literature, now cited in the manuscript). The total particle extinction obtained by this process can be verified by the extinction obtained independently by the Raman method. For daytime measurements, we take the closest nighttime measurement and test the aerosol type separation procedure.**

**In conclusion, the main reason for not using directly the extinction coefficient from the Raman method is the aerosol type separation process. A aerosol type separation process directly for the extinction coefficient may be developed in future.**

**We updated the manuscript in Section 2.1 and 3 to make this point better comprehensible.**

### **Specific Comments**

*1. Abstract, line 5. Suggest "....properties measure in situ with aircraft..."*

**Changed.**

*2. Abstract, lines 7-8, What is meant by "reasonable agreement" between lidar and in situ number concentrations? More quantitative description would be useful.*

**The sentence was reformulated as follows:**

**The CCN number concentrations derived from lidar observations were up to a factor of two higher than the ones measured in situ on board the research aircraft Falcon. Possible reasons for the difference are discussed.**

*3. Page 5, line 29. Does the method used by Ansmann et al. (2017) to decide whether the non-dust component was marine or continental use actual measurements of the lidar ratio? It would be helpful to have additional information here.*

**Thank you for the comment. We see that we have to describe this procedure in a better way.**

**The described method makes use of the independently measured extinction coefficient with the Raman lidar method (nighttime only). The extinction coefficient calculated from the dust backscatter coefficient (multiplied by the literature-based dust lidar ratio) and the non-dust backscatter coefficient (either multiplied by the typical marine (20 sr) or continental (50 sr) lidar ratio) has to be the same as the independently measured Raman (total) particle extinction coefficient.**

**The corresponding part was newly formulated to better explain the method.**

4. Page 6, lines 11-12. How was the lidar retrieval uncertainty determined to be a factor from 2 to 3? Where did this come from?

**Thank you for pointing out this issue. An explaining sentence was added.**

**“The retrieval uncertainty results from the uncertainty in determining the extinction-to-number-concentration conversion factor for small particles ( $r > 50$  nm or  $r > 100$  nm) using AERONET derived AOD and columnar number concentrations ( $n_{50}; n_{100}$ ) as described in Mamouri and Ansmann (2016).”**

**It is the uncertainty of the fit in the logarithmic space as shown in Mamouri and Ansmann (2016), Fig. 4,5, and 6. For the larger particles ( $n_{250}$ ) and the surface area concentration, the regression can be done in the linear space resulting in lower uncertainties.**

5. Page 6, line 13. *“Besides the large retrieval uncertainty, other uncertainty sources may have contributed to the systematic bias between the lidar and airborne in situ observations:”* The following sentences then describe other uncertainty sources. It’s not clear what sources of error contribute to the factor of 2-3 lidar uncertainty which are separate from the other uncertainty sources described in the following sentences. How much additional uncertainty do these other sources add to the factor of 2-3 lidar retrieval uncertainty?

**The factor 2 is the retrieval uncertainty resulting from the AERONET-based conversion factors (Mamouri and Ansmann, 2016) covering the basic question: How many  $n_{100}$  or  $n_{50}$  particles do we expect for a given extinction coefficient and a given particle type? Further sources of errors for our specific measurements are then listed in the paper.**

**Combined with the answer to your comment number 4, this should be stated clearer now in the manuscript.**

6. Page 7, line 20. What is meant by “large disagreement”

**The text was reformulated to avoid unclear formulations:**

**“Again for the fine particle dominated quantities, i.e., the fine-mode mass concentration, the lidar derives higher values than the in situ observed ones.”**

7. Table 1. Near the bottom, the formula for  $n_{CCN}$  contains items  $f_{ss,d}$ ,  $f_{ss,c}$ , and  $f_{ss,m}$ . How are these factors determined?

**An explanation have been added in the text (Sect. 2.1, page 4):**

**“An enhancement factor  $f_{ss}$  determined in Mamouri and Ansmann (2016) from various laboratory and field studies (activation diameter and supersaturation) is used to retrieve  $n_{CCN}$  for different supersaturation levels (see Table 1).”**

8. Figure 1. Suggest replacing the flight numbers in the legend with the dates of the three flights.

**Replaced.**

9. Figure 2. The color images show range-corrected signals of the cross-polarized channel. Why not instead show images of the actual particulate linear depolarization ratio? This would make it easier to compare the results from day to day.

**Thank you for the suggestion. The plots (in Fig. 2,6,7) now show the volume linear depolarization ratio, where the dust layer is much better visible than in the range-corrected signal.**

10. Figure 6. Same comment as item 9 above.

**Done.**

### Reply to Anonymous Referee 3

*The manuscript presents case study results from a few flights of the SALTRACE campaign, where ground-based Raman lidar measurements were made coincident with airborne in situ aerosol measurements. The Raman lidar backscatter measurements are converted to extinction coefficients by using an assumed lidar ratio, and then these extinction coefficients are used to estimate particle number concentrations using empirical conversion factors from previous literature. It appears from the manuscript that only three different aerosol types are considered, which are largely distinguished by whether the aerosols are depolarizing (indicating dust) or not depolarizing (indicating continental pollution). It's not clear how marine particles are identified, as these particles are likely to depolarizing when dry, but non-depolarizing when hydrated.*

**Let me give some explanations to the legitimate concerns of the reviewer. The used lidar ratios are confirmed by several studies based on Raman lidar measurements, e.g., Mueller et al., 2007, Groß et al., 2013, Baars et al., 2016 (now cited in the manuscript). And independent Raman extinction measurements are used to check the contributions of the non-dust aerosol (marine or continental). This process is now described in more detail at the end of Section 3, and was introduced and illustrated in Ansmann et al. (ACP, 2017). The key point here is that marine particles cause a lidar ratio of about 20 sr and fine-mode dominated particles (urban haze, biomass burning smoke) cause about 50 sr at 532 nm. And that helps to decide whether the non-dust component is of marine or continental origin as shown by Ansmann et al. (2017).**

**A slight influence of dry marine particles could be present, but the effect should be negligible inside the SAL as the air masses are almost undisturbed since leaving the African continent. The newly added case of pure marine conditions (Section 5.1), where no aerosol transport from Africa was present, shows a layer with some dry marine particles on top (Fig. 6), which can indeed lead to a misclassification. However, the effect on CCN is very small.**

*Having estimated particle number concentrations, then CCN and INP concentrations for arbitrary cloud conditions (e.g., 0.2% supersaturation) are estimated using additional assumed  $CCN=f(s)$  and INP activation functional relationships. All in all, there are a lot of assumptions made to get from Point A (lidar backscatter) to Point B (CCN and INP concentrations) and quite a lot of uncertainties stacking on top of each other. While the mass profile comparisons look great (Fig. 5), the agreement among the number concentration comparisons is much less strong. These relationships have been seen before in prior literature that have used more rigorous retrieval algorithms that rely on many fewer empirical assumptions (e.g., Sawamura et al., ACP, 2017, <https://www.atmos-chem-phys.net/17/7229/2017/>). While the present paper examines data from a few cases of merit, the methods represent only an incremental science contribution that doesn't really seem to advance the state-of-the-art. I defer to the editor's judgment as to whether this is sufficient to merit publication in ACP.*

**Indeed a lot of empirical assumptions are necessary, but they are clearly justified and based on climatological facts (AERONET observations and the correlation between particle extinction coefficient and particle number concentration). Our method is straight forward and the scatter in the AERONET plots clearly indicates the uncertainty. We have a well-defined error range for each of our parameters. So what is the point of criticism? In contrast, these rigorous retrieval algorithm, the reviewer mentions, are based on multiwavelength lidar methods and these methods belong to the class of ill-posed problems, and a lot of constraints need to be introduced to stabilize the solutions. Ill posed means even... almost undefined uncertainty range. That was the main reason to search for alternatives. Our method is much more robust than the multiwavelength method, especially when taking into account what immense effort is needed to guarantee always high quality multiwavelength lidar measurements over days, months and years. This is simply not possible. There is a mix of photoncounting and analog detection channels. This already often kills homogeneity and consistency in the data sets needed in these inversion methods, mentioned by the reviewer. In addition, there is notoriously the problem with 1064 nm: How to calibrate? How accurate are the 1064 nm backscatter coefficients? This is always an open question, even in the case of CALIOP. So, the multiwavelength lidar is often not usable as our experience with EARLINET over the last 20years clearly indicates. We need alternatives, methods that are robust, simple, straight forward and applicable to simple**



and robust lidar measurements. And exactly that was the basic motivation why we came up with polarization lidar method used in this study. This is an exciting and simple approach and it works!

So in conclusion, we prefer our method, but sure.... to check the quality of the products we need independent in situ measurements. Therefore we need aircraft observations. They are necessary to check to what extent all the conversions work or not. And our Barbados observations and comparisons are of high value because here we have aged dust after long-range transport over more than 5000 km. It is not easy to find other locations to measure such undisturbed scenarios as presented in this paper.

Thank you for pointing to the work of Sawamura et al. (2017). One could argue our work is somehow complementary to their study as they had to exclude all periods influenced by dust or other non-spherical particles, and we are focusing exactly on dust in the Saharan Air Layer. Lidar inversions of spherical particles have been widely applied, but non-spherical dust particles remain challenging for the retrievals. The AERONET-based approach of the POLIPHON method (Mamouri and Ansmann, 2016) overcomes the difficulties of the non-sphericity problem in the case of dust particles. We do not need no questionable dust shape model (spheroidal shape model) as needed in respective multiwavelength inversion attempts.

Our observations are unique and clearly deserve publication. To do field campaigns in the Caribbean with aircraft and advanced ground-based aerosol lidar is not just a routine job. SALTRACE stands not only for dust investigation in the Saharan air layer (SAL), but also for aerosol-cloud interaction experiment (...ACE). And this study here is clearly a contribution to this field of research. There is no publication with the topic we focus on. We focus on CCN and INP-relevant aerosol parameters. This is new! At least, we have never seen any publication except the TROPOS/CUT papers dealing with INP profiles.

The three presented cases have been selected based on the vicinity of Falcon aircraft observations to the lidar site and more cases would be desirable. Nevertheless, the similar good agreement of the three presented cases makes us believe that more comparisons in the SAL around Barbados would lead to the same results. The carefully analyzed and quality assured data sets from the in situ and lidar measurements are a solid basis for the inter comparison study.

*Specific comments:*

*1) The statement on Pg. 2, Line 9 that the ground-based lidar is observing CCN number concentration and INP-relevant aerosol properties is not true! No such measurement is being made. Instead, a highly-empirical series of conversion factors are being applied to backscatter observations to retrieve aerosol concentrations that may or may not be relevant for CCN and INP activation processes. In addition, it needs to be recognized that there is already quite a bit of literature looking at relationships between lidar measurements and aerosol extensive parameters. It doesn't seem appropriate to imply that this study is somehow "a first", as to make the case for this, one has to slice the data attributes pretty finely (e.g., use of a specific ground-based Raman lidar and the focus on dust over the remote Atlantic west of the source regions, conversion of particle number concentration measurements to CCN and INP concentrations at specific, arbitrary conditions). There needs to be better truth in advertising in this paper. Please remove the sentences on Pg. 2, Line 9; Pg. 8, Line 29; and potentially elsewhere that imply that this study is a first of its kind and that the lidar is observing CCN and INPs.*

The sentences have been re-phrased where appropriate as requested by the reviewer. Comparisons between the vertical profiles of a lidar system and coincident airborne in situ measurements have a long history. As mentioned already, the new aspects of our lidar-aircraft study are the comparison of cloud-relevant aerosol properties needed for CCN and INP profiles under heavy dust influence. Previous studies based on inversion of the lidar data often exclude dusty periods with highly depolarizing dust particles in their retrievals. The reviewer is right that the lidar does not observe CCN and INP, but rather derive or retrieve vertical profiles of CCN and INP number concentrations. The manuscript has been screened for such formulations.

*2) What is the basis for doing the CCN comparisons at 0.2% supersaturation? Is this a realistic supersaturation for clouds in this region? How would the comparison look for higher supersaturations (e.g., 0.4% or 0.6%)? For lower supersaturations (e.g., 0.1%)?*

Thank you for this remark. A supersaturation of 0.2% is a typical value (or standard) in CCN field observations and also a typical value describing usual supersaturations in the case of trade wind cumuli developing during fair weather conditions in the Caribbean. A sentence explaining our choice was added:

**“The supersaturation of 0.2% with respect to water is motivated by the findings of Wex et al. (2016) as a typical value for trade wind cumuli in the Barbados region. Therefore, one of the CCN counters aboard the Falcon aircraft was set to this fixed supersaturation.”**

**More details to the differences in the CCN concentrations for 0.4% and higher super saturation may be found in the paper of Mamouri and Ansmann (ACP, 2016).**

*3) After reading the conclusions section, I'm unclear how this study advances the use of lidar observations to place constraints on CCN or INPs. The outlook that the authors lay out is that more comparisons in other environments are needed. Why? How will more comparisons be helpful? Would we expect the agreement between the lidar retrieval and in situ data to be better or the same? What contribution does this study make? I'd like to see more discussion that contextualizes how the present study is an advance upon the state-of-the-art.*

**Motivated by the questions of the reviewer, the summary and conclusion section was completely rearranged and re-phrased. We summarize the main findings and draw main conclusions, and provide an outlook. We explain why we need more comparisons (aircraft vs lidar) and what our own next step will be (Cyprus campaign, aircraft vs lidar in an area with complex aerosol mixtures of fine-mode aerosol pollution and dust from the Middle East and Sahara).**

**To give more details here in the reply letter: It is essential to have a well-tested and validated approach to derive CCN and INP profiles from lidar measurements (and this means global coverage in the case of spaceborne lidars). As the reviewer already pointed out, the empirical relationships derived with long-term AERONET data need to be tested under different aerosol conditions. The present study focusses on mineral dust, but more inter comparisons, especially in continental polluted environments with complex mixtures of different aerosol types, are necessary. The good agreement in the  $n_{250}$  number concentrations is already promising.**

## Reply to Paul DeMott

### General Comments

*This paper continues a series of papers themed around the use of lidar retrievals to estimate CCN and INP profiles. These developments of capabilities are being followed with interest by a broad community since the applications and utility are obvious for regions where in situ data are not available, or not available with high frequency. This paper will make a nice incremental contribution to the growing literature base of this team, focusing here on comparison to aircraft data that did not have INP data to compare to. I do have some critical comments and suggestions in a few regards.*

*1) First, I believe that the nature of retrieval of multiple species contributions to aerosol number, mass, CCN and INP requires some additional description because this is a more recent development (versus retrievals from layers dominated by a single aerosol type) and so bears reiterating from its introduction over the last two years. If the Marinou et al. paper is accepted for publication, reference should be made to the detailing of the detailed schematic there.*

**Thank you for the hint. The description of the aerosol type separation has been improved and a reference to the recently published work by Marinou et al. (2019) has been made.**

*2) Secondly, I feel that the use of the DeMott et al. (2010) parameterization as specific to continental and non-dust contributions to INPs is not exactly correct, and this has implications. The “continental” definition in Mamouri and Ansmann (2016) neglects the fact that dust contributions to INPs were most certainly folded into the parameterization in a variety of environments. I see now that Marinou et al. (2018) have written, “As the majority of the samples used for D10 are non-desert continental aerosols, this INP parameterization has been considered to be suitable for addressing the immersion and condensation freezing activity of mixtures of anthropogenic haze, biomass burning smoke, biological particles, soil and road dust (Mamouri and Ansmann, 2016).” This is also a gross simplification, with the actual contributors unknown, and the likelihood that dust was folded in at a variety of levels of contribution. After all, one study was PACDEX, the Pacific Dust Experiment. Hence, strong caveats about potential duplication of INPs, and lack of assured attribution to all of the other types mentioned, are needed here. What one may really wish for are parameterizations for all relevant INP species instead. Substitution of D10 for the absence of such detailed information is not ideal, and so I am concerned that this is being glossed over. It is worrisome that this assumption seems to have propagated into a number of papers since 2016, and in some cases is even called “non-dust” or continental “pollution”, the former not being true to the original paper and the latter being a true stretch in attribution that has never been supported by direct evidence.*

**Thank you, Paul DeMott, for correcting the use of your parameterization. We follow your comment and use the DeMott et al. (2010) parameterization now for all aerosols and not a specific type to not propagate the misinterpretation of your parameterization any further. As an input in the D10 parameterization we use the n250 derived for dust plus the n250 derived for continental or marine aerosol in the same layer as we derive n250 per aerosol type. In Fig. 4, now D10 is used for n250\_dust+cont in the SAL (above 2 km height) and for n250\_dust+marine in the marine aerosol layer below the SAL (dashed line). So we give all aerosol particles with radius larger than 250 nm as input in the D10 parameterization. For D15 we give only the dust particles as input.**

*3) I also wondered about the use of the groups’ own parameterization of sea spray aerosols (based on DeMott et al., 2016, since that paper did not promote a direct parameterization) versus a marine-specific parameterization for the Atlantic region that is referenced in the introduction (McCluskey et al., 2018). Do they compare well? I obviously know the answer, but you might justify persisting with a parameterization that did*

*not as deeply consider “pure” marine as did the newer McCluskey paper. I realize that this is a very minor point, since marine INPs at -25 °C are minor contributors compared to mineral dusts in SAL conditions.*

**We clarified this point and implemented the McCluskey et al. (2018) parameterization for marine aerosol.**

*4) For the use of the DeMott et al. (2015) parameterization (D15), it seems that a decision has been made to not use the recommended 3x correction factor for immersion freezing that was justified in that paper? If so, the basis/reasoning for this should be stated.*

**Following your recommendation, we insert the correction factor of 3 in our calculations again. It is now explicitly stated in the manuscript. As we don't have in situ INP measurements to compare, we cannot state anything about the correction factor. The new parameterization by Harrison et al. (2019) for K-feldspar (1% for dust over Barbados) leads to results in the same range as D15 (with or without correction factor).**

*5) Finally, I think that it would be very useful to demonstrate retrievals in a profile that does not necessarily include dust or smoke overlying or mixing in the region above the marine boundary layer. That would represent the unperturbed case, and give insights into the behavior of the combined set of parameterizations when dust is not at all dominant.*

**Thank you for your suggestion. We included a new section 5.1 presenting a pure marine case without aerosol transport from Africa from the SALTRACE-2 winter campaign. This case shows the undisturbed marine background conditions of the Eastern Caribbean. The INP concentration calculated with the McCluskey (2018) parameterization is about 3 orders of magnitude lower than in the dusty summer cases using D15 parameterization.**

*Additional context to these comments and some additional specific questions/editorial comments for addressing before publication are listed below.*

### ***Specific Comments***

*1) Page 2, lines 2-4: What papers are you referring to in stating the implementation of these parameterization schemes? These are not all included in this present paper, although it would be interesting to see. Also, please note that there is no parameterization given in DeMott et al. (2016). This must have been created by the authors.*

**The reference to DeMott et al. (2016) was removed. We do not show all parameterizations mentioned in the introduction as the main focus of the paper is to evaluate the INP-relevant aerosol properties against in situ measurements and not to discuss the differences in all available INP parameterizations. This is a topic for its own, best with some in situ measured INP concentrations. For example, we calculated the INP concentrations in the SAL using the Ullrich et al. (2017) immersion freezing parameterization and found about one order of magnitude more INP.**

*2) Page 2, line 10: fix “several 10000 km” to state a range of distances expected.*

**Fixed. It is approximately 5000 km from the source to Barbados.**

*3) Page 2, lines 25-27: Note that as written, the sentence is repetitive in mentioning dust and smoke mixture at the beginning and ends of the sentence.*

**Corrected.**

*4) Page 3, lines 2: The continental aerosol designation is not mentioned here, as listed in Table 2. As stated above, this needs some serious caveats applied, namely that it is used in the absence of a true set of parameterizations that could describe other than mineral dust input, even though it definitely includes some influence from varied levels of mineral dusts in the studies used by D10. It was not intended to be specific or neglectful of any particular class of INPs.*

**The D10 parameterization is now used not for a specific type of aerosol, but rather for all aerosol particles with radius larger 250 nm as derived from our lidar observations. See comment above.**

*5) Last paragraph of Page 3, and start of Page 4: This discussion of assumptions on the hygroscopicity of mineral dust wanders some and never quite makes clear if kappa values for Saharan dust after transport to the region have been measured as low as is assumed or if this is an assumption based on the “fresh” nature of dust observed via say, microscopy studies. There is a difference, as trace amounts of materials can make a difference. In the end, it seems that the value selected of 0.02 is in the range of most measurements (i.e., not fully hydrophobic), and in the range estimated to be consistent with activation in clouds as submicron dust particles in the Eastern Atlantic (Twohy et al., GRL, 36, L01807, doi:10.1029/2008GL035846, 2009).*

**Thank you for your comment. We strengthened the discussion in this paragraph. The kappa values are not measured but taken from the literature assuming the “fresh” nature of dust even after long-range transport as support by several studies cited in the manuscript.**

*6) Page 4, line 14: The statement “The very hydrophilic sea salt particles (sodium chloride) have an activation diameter. . .” sounds awkward. Sea salt is hygroscopic. But sea salt is rarely the composition of sea spray particles alone, so why not say that “We assume a composition of sea salt for marine aerosols, and prescribe an activation diameter of. . .”*

**Thank you. The statement was rephrased.**

*7) Page 5, line 23: Perhaps discuss that cumuli attenuate the lidar, versus “disturbed” the measurements?*  
**Changed.**

*8) Page 5, paragraph starting line 29: This is where I suggest that some elaboration on the methods for retrieving the contributions of different aerosols in a mixed scenario is given.*

**The description was improved here (and as well in Sect. 2.1):**

**“Because of the geographical location of Barbados, backward trajectories were not sufficient to decide whether the non-dust component was of marine or continental origin. Instead the method described in Ansmann et al. (2017) was applied which uses the fact that continental aerosol particles have a significantly higher lidar ratio (50 sr) due to considerable light absorption and much smaller particle sizes than the ones of marine aerosol particles (20 sr). The independently measured total particle extinction coefficient (from our Raman lidar measurements Ansmann et al., 1992) is compared to the sum of the extinction coefficients obtained by multiplying the type-separated backscatter coefficients with the respective type-dependent lidar ratios. An example will be shown in Section 5. A good agreement was found for continental pollution aerosol in the SAL and marine aerosol in the marine aerosol layer below.”**

*9) Page 6, line 21: the CCN data from the Falcon are “measurements.” They may have uncertainties, but they are not retrievals.*

**Corrected.**

*10) Page 7, first paragraph: Is the surface area used only for the marine parameterization? Do the dust parameterizations using s significantly differ from D15? I only wondered about the derivation of surface area if it was not going to be used.*

**Now the parameterizations by McCluskey et al. (2018) and Harrison et al. (2019) use s. Furthermore, the Ullrich et al. (2017) uses s. However, the U17 parameterization for immersion freezing tends to lead to quite high INP concentrations and is therefore not shown in the manuscript (but can be easily added).**

11) Page 7, lines 8-10: *This is a rather subjective statement about the likely role of the INP concentrations derived for the SAL. Clearly, direct cloud observations or cloud model simulations are likely needed to explore the implications, since such tropical cumuli are known to contain rather vigorous secondary ice formation processes through their deep supercooled layers (e.g., see Lasher-Trapp et al., J. Atmos. Sci., 73, 2547- 2564, 2016, and references to Lawson et al., 2015 and Heymsfield and Willis, 2014 therein).*

**The statement was removed.**

12) Page 7, line 21: *Consider replacing “Wrong in situ particle counting. . .” with uncertainties in in situ aerosol measurements. There is no support provided for how or why the measurements would be wrong. They are your only link to apparent ground truth.*

**The sentence was reformulated.**

13) Page 8, line 15: *suggest leading to “likely changes in trade wind cumulus cloud microphysical properties. . .” rather than “developments”. Also, does it not depend on which layer dominates aerosol contributions to convective clouds?*

**We adopted your suggestion and reformulated the sentence.**

14) Page 8, line 32: *Suggest “reconciled” for “fixed”*

**Changed.**

15) Page 9: *The summary paragraph is a bit short in its outlook for the future. You would seem to benefit from more validation INP data, particularly for cases with and without dust, so the validity of the apparent knowledge of continental that you promote is also checked. And not only in dusty situations. Will you have INP data in any of the forthcoming campaigns? Quantifying other specific aerosol type contributions than dust and marine would appear useful as well.*

**The summary paragraph was completely reshaped. Airborne INP measurements would be indeed very helpful, but it is not easy to get them as most groups are measuring INP at ground level. So we have to stick to the comparison of the CCN and INP-relevant aerosol parameters. This is what we firstly have to validate from the lidar perspective. For the step from surface area and particle number concentration to INP concentrations we depend on the laboratory based INP parameterizations. To evaluate our algorithms under different aerosol situations is an important point for future activities. We will use measurements in the Eastern Mediterranean from the A-LIFE campaign (April 2017) where mixtures of urban pollution with Saharan and Middle Eastern dust as well as marine particles are observed.**

16) Table 1 header: *the cv coefficients need explanation. Are these the “conversion factors” mentioned?*

**They are the extinction-to-volume conversion factors now mentioned in the text.**

17) Table 2: *as mentioned, DeMott et al. (2016) does not include a parameterization, so that is not the appropriate reference for it. I suggest using the specific parameterization of McCluskey et al., if that is possible. Also the D15d reference needs to mention somewhere (if not in the table) what cf factor is used in this study.*

**Done.**

18) Figure 4: *I can note similar s values here as in DeMott et al. (2015) for the SAL over the Western Caribbean, but the predicted INP concentrations are a bit lower here at around -25\_C. This motivated me to ask about the cf factor assumed for use in the parameterization in the present study. Also, below 2km, is it certain you are dealing with dust and not marine aerosols in all cases? Is this why the lidar profile showing higher surface area*

*and n250 on 22 June still leads to a decrease in D15-predicted INPs? Is that because you presume all of those particles are "continental"? This is where I think the application of a D10+D15 approach could lead to errors, and the only way to tell will be future in situ INP measurements.*

**You are right, below 2 km height we are dealing with a mixture of dust and marine particles. The plots were changed correspondently.**

*19) Figure 6 inspired me to ask what an unperturbed profile might look like, for example when there is not a strong dust or smoke or pollution layer over the clouds. Do you have any such data?*

**We included such case (26 Feb 2014) from the SALTRACE-2 winter campaign to show a case unperturbed by African aerosol. Unfortunately, the aircraft measurements are only available during the SALTRACE-1 campaign in summer 2013.**

# Profiles of cloud condensation nuclei, dust mass concentration, and INP-relevant aerosol properties in the Saharan Air Layer over Barbados from polarization lidar and airborne in situ measurements

Moritz Haarig<sup>1</sup>, Adrian Walser<sup>2</sup>, Albert Ansmann<sup>1</sup>, Maximilian Dollner<sup>2</sup>, Dietrich Althausen<sup>1</sup>, Daniel Sauer<sup>3</sup>, David Farrell<sup>4</sup>, and Bernadett Weinzierl<sup>2</sup>

<sup>1</sup>Leibniz Institute for Tropospheric Research (TROPOS), Leipzig, Germany

<sup>2</sup>Faculty of Physics, University of Vienna, Vienna, Austria

<sup>3</sup>Institut für Physik der Atmosphäre, Deutsches Zentrum für Luft- und Raumfahrt (DLR), Oberpfaffenhofen, Germany

<sup>4</sup>Caribbean Institute for Meteorology and Hydrology, Bridgetown, Barbados

*Correspondence to:* Moritz Haarig (haarig@tropos.de)

**Abstract.** The present study aims to **evaluate** lidar retrievals of cloud-relevant aerosol properties by using polarization lidar and coincident airborne in situ measurements in the Saharan Air Layer over the Barbados region. Vertical profiles of the number concentration of cloud condensation nuclei (CCN), large particles (diameter  $d > 500$  nm), surface area, and ice nucleating particles (INP) are **derived** from the lidar measurements and compared with CCN concentrations and the INP-relevant aerosol properties **measured in situ with aircraft. The measurements were performed** in the framework of the Saharan Aerosol Long-range Transport and Aerosol–Cloud–interaction Experiment (SALTRACE) in summer 2013.

The CCN number concentrations derived from lidar observations were up to a factor of two higher than the ones measured in situ on board the research aircraft Falcon. **Possible reasons for the difference are discussed.** The number concentration of particles with dry radius  $> 250$  nm and the surface area concentration obtained from the lidar observations and used as input for the INP parameterizations agreed well ( $< 30$ – $50\%$  deviation) with the aircraft measurements. In a pronounced lofted dust layer during summer (10 July 2013), the lidar retrieval yielded  $100$ – $300$  CCN per  $\text{cm}^3$  at  $0.2\%$  water supersaturation and **10–200** INP per L at  $-25^\circ\text{C}$ .

During the SALTRACE winter campaign (March 2014), the dust layer from Africa was mixed with smoke particles which dominated the CCN number concentration. This example highlights the unique lidar potential to separate smoke and dust contributions to the CCN reservoir and thus to identify the sensitive role of smoke in trade wind cumuli developments over the tropical Atlantic during the winter season.

## 1 Introduction

Climate predictions are highly uncertain (IPCC, 2013). One of the reasons is our poor knowledge of the impact of atmospheric aerosol on cloud processes. To improve our understanding of aerosol–cloud interaction, new techniques for profiling of cloud condensation nuclei (CCN) and ice-nucleating particles (INP) are required. Lidar permits a regular and continuous monitoring of the cloud-relevant aerosol properties up to the tropopause height. Methods have been developed to retrieve CCN and INP-



relevant particle microphysical properties from particle extinction coefficients measured with lidar (Mamouri and Ansmann, 2016; Sawamura et al., 2017; Lv et al., 2018). In the case of INP profiling, particle extinction coefficients are converted to particle number concentrations  $n_{250}$  (particles with dry radius >250 nm) and particle surface area concentrations  $s$ . The  $n_{250}$  profile is input in the INP parameterization schemes of DeMott et al. (2010, 2015) and Tobo et al. (2013) and  $s$  profiles are input in respective INP parameterizations by Niemand et al. (2012), Steinke et al. (2015), Ullrich et al. (2017), McCluskey et al. (2018), and **Harrison et al. (2019)**. The entire lidar-based INP lidar retrieval procedure is described by Mamouri and Ansmann (2016). First comparisons of the CCN lidar retrievals with airborne in situ observations over a polluted Central European site are presented by Düsing et al. (2018). **Sawamura et al. (2017) found good agreement of the lidar-derived surface area and volume concentration with coincident airborne in situ observations focusing on air quality and explicitly excluding periods with the presence of dust particles.** Airborne INP studies in the Cabo Verde region found around 100 INP per liter at  $-23^{\circ}\text{C}$  in the Saharan Air Layer (SAL) (Price et al., 2018). First comparisons of lidar and in situ observations in dusty environments (Eastern Mediterranean) regarding INP can be found in Schrod et al. (2017) and Marinou et al. (2019). **In this article, we present a detailed comparison of ground-based lidar retrievals to airborne in situ observations of CCN number concentration and INP-relevant aerosol properties. Using observations of transported dust over the remote Atlantic 5000 km west of the source regions in Africa, we demonstrate the capability of the lidar retrievals to predict the aerosol properties relevant to aerosol–cloud interaction.** We use the opportunity of the SALTRACE campaign (Saharan Aerosol Long-range Transport and Aerosol–Cloud-interaction Experiment, Weinzierl et al., 2017), conducted in the Caribbean (Barbados region), for this goal. More than 12 weeks of lidar measurements were performed in June–July 2013 (SALTRACE-1), February–March 2014 (SALTRACE-2), and June–July 2014 (SALTRACE-3). A triple-wavelength polarization Raman lidar (Haarig et al., 2017a) of the Leibniz Institute for Tropospheric Research (TROPOS) was operated at the Caribbean Institute for Meteorology and Hydrology (CIMH), north of Bridgetown, Barbados ( $13.15^{\circ}\text{N}$ ,  $59.62^{\circ}\text{W}$ , 110 m about sea level). Airborne in situ measurements were performed during SALTRACE-1. An overview of the instrumentation on-board the research aircraft Falcon of the German Aerospace Center (Deutsches Zentrum für Luft- und Raumfahrt – DLR) is given by Weinzierl et al. (2017).

SALTRACE observations of the long-range transported Saharan dust have been published in the SALTRACE special issue (Groß et al., 2015; Haarig et al., 2017a; Gasteiger et al., 2017; Kandler et al., 2018). The lofted dust plumes in the Saharan air layer (SAL) occur between 1.5–5 km height. Many simultaneous measurements with aircraft and the ground based lidar have been realized during SALTRACE. For our study, we use the Falcon observations of the particle size distribution and of the CCN number concentration. In the lidar-Falcon comparisons, three case studies are analyzed. CCN properties have been studied previously in the Caribbean but without involving vertical profiling with lidar (Siebert et al., 2013; Kristensen et al., 2016; Wex et al., 2016; Jung et al., 2016). A dust–smoke mixture **and a pure marine case** from the SALTRACE-2 (winter campaign) are presented in addition to contrast the almost pure dust conditions prevailing during the summer half year. This comparison highlights the strong impact of smoke particles on the CCN levels over the remote tropical Atlantic during the winter half year (biomass burning season). **Whereas the pristine marine case demonstrates the aerosol conditions without long-range transport of African aerosol to the Caribbean.**

The paper is structured as follows: In Sect. 2, the ground-based and airborne instrumentation and the lidar retrieval are shortly presented. Then the three Saharan dust cases (used in our comparison study) are described regarding dust layering, the meteorological context, and air mass transport (Sect. 3). In Sect. 4, CCN concentrations and particle number, surface area and mass concentrations obtained from the aircraft and lidar measurements are compared. In Sect. 5, summer and winter lidar observations are contrasted. A summary and concluding remarks are given in the last section.

## 2 Instrumentation and methods

### 2.1 Lidar retrievals of CCN and INP concentrations

The triple-wavelength polarization Raman lidar BERTHA (Backscatter, Extinction, lidar Ratio, Temperature, Humidity profiling Apparatus) described in Haarig et al. (2017a) measures the backscatter coefficient at three wavelengths (355, 532, and 1064 nm), the extinction coefficient at 355 and 532 nm and in a new configuration also at 1064 nm (Haarig et al., 2016). The depolarization ratio is measured at 355, 532, and 1064 nm simultaneously. During the SALTRACE campaigns in 2013–2014, the lidar was deployed at the Caribbean Institute for Meteorology and Hydrology (CIMH), at Husbands, 5 km north of the capital Bridgetown, Barbados.

The conversion from backscatter coefficient and particle linear depolarization ratio (PLDR) to particle number and surface area concentration follows the method described in Mamouri and Ansmann (2015, 2016). The particle depolarization ratio is used to separate the contributions of different aerosol types to the backscatter coefficient: **mineral dust (d) with high depolarization ratio (around 0.3), marine aerosol (m) with low depolarization ratio in humid state ( $\leq 0.05$ ), and continental aerosol (c) with low depolarization ratio ( $\leq 0.05$ ).** By multiplication with an appropriate extinction-to-backscatter ratio (lidar ratio,  $S_d=55$  sr,  $S_m=20$  sr,  $S_c=50$  sr, Müller et al., 2007; Groß et al., 2013; Baars et al., 2016) the backscatter coefficients are converted into extinction coefficients (see also description in Marinou et al., 2019). The values of the lidar ratio have been checked independently by BERTHA’s Raman lidar measurements from the closest nighttime observations. Long-term AERONET observations (columnar particle number concentrations and aerosol optical depth (AOD), Holben et al., 1998) are used to derive empirical conversion factors from extinction coefficients to particle number and surface area concentrations (Mamouri and Ansmann, 2016; Ansmann et al., 2019). The respective equations and the conversion factors are listed in Table 1. The AERONET data are filtered for dust events ( $\text{\AA}$ ngström exponent  $AE < 0.3$ ,  $AOT > 0.1$  at 500 nm), pure marine ( $0.25 < AE < 0.6$ ,  $AOT < 0.07$ ) and continental ( $AE > 1.6$ ) conditions. It should be mentioned that the conversion factor for small continental aerosol particles ( $n_{50,c}$ , particles with radius  $> 50$  nm), is obtained using AERONET data from Leipzig (Central Europe), but with a factor of 0.5 to best approximate the African rural aerosol conditions (Shinozuka et al., 2015).

In a next step, INP and CCN concentrations are retrieved. INP parameterizations have been developed for the aerosol types dust, soot, and marine particles (see Table 2). The number concentration  $n_{250}$  and the surface area concentration  $s$  are the aerosol-relevant input parameters which are obtained by conversion of the lidar-derived particle extinction profiles. In the present study,

we focus on immersion freezing, i.e., ice nucleation by an INP immersed into a liquid-water droplet. **The parameterization by DeMott et al. (2010) is used for the dust and non-dust (continental or marine) particles with radius >250 nm, whereas the DeMott et al. (2015) parameterization is explicitly developed for dust particles. Harrison et al. (2019) developed a parameterization for the very ice-active mineral K-feldspar which is part of the Saharan dust. Mineralogical measurements at Barbados show that only 1% of the dust particles consists of K-feldspar (Kandler et al., 2018). Therefore, we assume the K-feldspar parameterization by Harrison et al. (2019) is valid for 1% of the total surface area of dust. The surface-area based INP parameterization developed by Ullrich et al. (2017) leads to much higher values and are not shown in this study. McCluskey et al. (2018) developed a parameterization for marine aerosol with samples from the Atlantic Ocean. The INP parameterizations and input parameters are listed in Table 2.**

To estimate the CCN number concentration  $n_{CCN}$ , Mamouri and Ansmann (2016) use a dry activation diameter of 200 nm for dust and 100 nm for continental pollution and marine particles at 0.15–0.2% water supersaturation. **An enhancement factor  $f_{ss}$  determined in Mamouri and Ansmann (2016) from various laboratory and field studies (activation diameter and supersaturation) is used to retrieve  $n_{CCN}$  for different supersaturation levels (Table 1). The supersaturation of 0.2% with respect to water is motivated by the findings of Wex et al. (2016) who reported this as a typical value for trade wind cumuli in the Barbados region. CCN concentrations at the same supersaturation (0.2%) were measured in situ with a CCN counter aboard the Falcon research aircraft.**

The use of the different activation diameters (100 nm for continental pollution aerosol and for marine particles, 200 nm for dust) is motivated by the following facts. Based on kappa-Köhler theory (Petters and Kreidenweis, 2007), we computed the activation diameter for 0.2% water supersaturation and temperatures from  $-10^{\circ}\text{C}$  to  $20^{\circ}\text{C}$  for various materials and chemical compositions (Table 3), in which  $10^{\circ}\text{C}$  is the most realistic value within the SAL as indicated by local radiosondes. Fresh Saharan dust **mimicked by dry-generated dust** is very hydrophobic (low hygroscopicity parameter  $\kappa$ ) so that the activation diameter is around 275 nm (at  $10^{\circ}\text{C}$ ). Cloud-processed Saharan dust particles (**mimicked by wet-generated dust samples**) may have changed their hygroscopic properties (higher  $\kappa$  value) so that their CCN efficacy increased. Laboratory studies with wet-generated dust particles (in contrast to dry-generated fresh dust particles) reported higher  $\kappa$  values (Koehler et al., 2009; Herich et al., 2009; Kumar et al., 2011b). However, although the Saharan dust was transported over several thousands of kilometers across the Atlantic Ocean, observations suggest that the dust in the SAL remained nearly unprocessed (Lieke et al., 2011; Denjean et al., 2015; Weinzierl et al., 2017; Kandler et al., 2018). **Therefore,  $\kappa$  should not change significantly during transport and be closer to the value for fresh Saharan dust which is taken from laboratory studies (Koehler et al., 2009; Herich et al., 2009; Kumar et al., 2011a, b). Twohy et al. (2009) found good agreement for their CCN measurements with a  $\kappa$  of 0.05 in the Eastern Atlantic. Herich et al. (2009) concluded that the activation diameter for Saharan dust (dry generated) is most probably 200 nm at a supersaturation of 0.2%. This is confirmed by studies of Shinozuka et al. (2015) and Lv et al. (2018). Following this discussion, we assume an activation diameter of 200 nm for Saharan dust at Barbados which corresponds to a  $\kappa$  value of approximately 0.05.**

The activation diameter for continental aerosol particles (fine-mode pollution) depends on their chemical composition. Kandler et al. (2018) found sulfate particles as a dominant contribution of continental pollution aerosol in the SAL, but the instrumentation

was not suitable to detect organics. Considering ammonium sulfate with a small contribution of less hydrophilic organic particles as continental aerosol within the SAL, a dry activation diameter of 100 nm at a supersaturation of 0.2% is a suitable estimate and therefore used in this study.

**We assume sea salt to be the dominant component of the marine aerosol, and prescribe an activation diameter** of 70 nm (Table 3, at 0.2% supersaturation and 10°C). Whereas Mamouri and Ansmann (2016) estimated a dry activation diameter of 100 nm based on literature. Going from 100 nm to 70 nm as activation diameter, would increase  $n_{CCN}$  by a factor of approximately 1.5.

In conclusion, we used a dry activation diameter of 200 nm for Saharan dust, and of 100 nm for continental and marine particles, assuming a supersaturation of 0.2% in the SALTRACE studies.

The polarization lidar–photometer networking technique (POLIPHON) introduced by Mamouri and Ansmann (2014, 2017) delivers mass concentrations of fine and coarse mode dust, i.e., dust particles with diameter  $d < 1 \mu\text{m}$  and  $d > 1 \mu\text{m}$ , respectively (Table 1). The PLDR at 532 nm is used to separate the contributions of non-dust aerosol (PLDR=0.05), fine-mode dust (PLDR=0.16), and coarse-mode dust (PLDR=0.35). **The lidar-derived extinction coefficient of the fine and coarse mode dust component is converted into volume concentration using long-term AERONET data sets and finally to mass concentration using the mass density of dust ( $2.6 \text{ g/cm}^3$ ) (Mamouri and Ansmann, 2014, 2017).**

## 2.2 Airborne in situ aerosol measurements

A full list and details of the instrumentation installed aboard the research aircraft Falcon of the DLR are given in Weinzierl et al. (2017). Information on size-resolved particle number concentrations are obtained from condensation particle counters and optical particle spectrometers. The condensation particle counters were operated at slightly different cutoff diameters around 10 nm.

The spectrometer setup included an airborne version of the Ultra High Sensitivity Aerosol Spectrometer (Cai et al., 2008; Brock et al., 2011; Kupc et al., 2018), a Grimm model 1.129 SkyOPC, and a Cloud and Aerosol Spectrometer (Baumgardner et al., 2001). The combination of these spectrometers covers the complete range of particle diameters from about 70 nm to  $50 \mu\text{m}$ . Particle number size distributions (NSDs) are derived from the entirety of these data using a consistent Bayesian inversion method (Walser et al., 2017). Here, the NSDs are approximated by trimodal log-normal distributions. In situ cloud condensation nuclei concentrations are measured with a Cloud Condensation Nuclei Counter (Roberts and Nenes, 2005; Lance et al., 2006) operated at a water vapor supersaturation of 0.2%. These concentrations are corrected for losses of large CCN at the aircraft’s isokinetic aerosol inlet.

## 3 Lidar observations of SAL dust layering: Comparison days

Three cases of the SALTRACE summer-2013 campaign were selected for in-depth comparisons of lidar and aircraft observations: 22 June, 10 July, and 11 July 2013. The criteria for the selection were based on the low spatial distance between the lidar site and the Falcon aircraft (flight patterns in the Barbados region, see Fig. 1). The time-height displays of the **volume depolarization ratio** at 532 nm shown in Fig. 2 indicate very homogeneous dust structures in the SAL on these three days and

thus good conditions for comparisons. Daytime lidar observations are used to have coincident measurements with the Falcon aircraft. Below 2 km height, trade wind cumuli **attenuated the lidar signals**. Only the cloud-free profiles were used to calculate the mean backscatter coefficient and depolarization ratio. Table 4 contains information about the measurement periods of the Falcon aircraft and the lidar including the mean horizontal distance of the Falcon from the lidar site and flight height levels.

5 Except for two flight legs, the mean distance was below 100 km. In the SAL, winds from eastward directions with a wind speed between 10 and 18 m/s prevailed leading to a dust transport of 35–65 km/h. The lidar profiles were averaged over 100–140 minutes which corresponds to a spacial average of 60–150 km considering the wind speed. Therefore, the Falcon aircraft and the ground-based lidar observed in principle the same dust layer at these selected days.

A weak dust outbreak was observed on 22 June 2013 (Fig. 2a–b), belonging to the first out of four main dust periods during 10 SALTRACE-1 (Groß et al., 2015). The trajectories (not shown) indicate a possible dust uptake over Mali and Mauritania 8–9 days prior to the arrival at Barbados. In contrast to the later two cases, these air masses spent more time in the populated coastal region of west Africa (Senegal) and so the probability of anthropogenic influence was high.

After the passage of the tropical storm Chantal (Weinzierl et al., 2017), a strong and stable flow of Saharan dust towards the Caribbean established and lasted for more than 4 days (10–13 July 2013). We use the 10 and 11 July observations for the 15 comparison study. The Saharan Air Layer (SAL) extended vertically from 1.8 km to almost 5 km height as shown in Fig. 2c–f. As already discussed in Haarig et al. (2017a) based on backward trajectory analysis and the particle depolarization ratio measurements, pure dust conditions (with rather low probability of contamination with anthropogenic pollution) were given. The dust traveled 5–7 days over the Atlantic Ocean.

**The CCN and INP parameterizations are aerosol-type dependent. Therefore, a separation into a dust and non-dust**  
 20 **(continental or marine aerosol) is necessary as done in Mamouri and Ansmann (2016) and Marinou et al. (2019). Pure Saharan dust has a PLDR at 532 nm of  $0.31 \pm 0.03$  (Freudenthaler et al., 2009), whereas continental pollution / smoke and marine aerosol have a PLDR  $\leq 0.05$  (Groß et al., 2013; Baars et al., 2016). The particle depolarization ratio is the best indicator for the presence of dust. Its vertical profile (Fig. 2) indicates that not only dust was transported in the SAL, but a mixture of dust and non-dust. On 10 and 11 July 2013, however, only a rather small non-dust component was present**  
 25 **(layer mean PLDR at 532 nm of  $0.29 \pm 0.02$  and  $0.31 \pm 0.02$ , respectively). In contrast, on 22 June 2013 the non-dust component was significant (PLDR of  $0.25 \pm 0.03$ ). The indicated uncertainty considers systematic errors and statistic uncertainties in the lidar data analysis. Because of the geographical location of Barbados, backward trajectories were not sufficient to decide whether the non-dust component was of marine or continental origin. Instead the method described in Ansmann et al. (2017) was applied which uses the fact that continental aerosol particles have a significantly higher lidar ratio (50 sr)**  
 30 **due to considerable light absorption and much smaller particle sizes than the ones of marine aerosol particles (20 sr). The independently measured total particle extinction coefficient from our Raman lidar measurements (Ansmann et al., 1992) is compared to the sum of the extinction coefficients obtained by multiplying the type-separated backscatter coefficients with the respective type-dependent lidar ratios. An example will be shown in Section 5. A good agreement was found for continental pollution aerosol in the SAL (> 2 km height) and marine aerosol in the marine aerosol layer below**

(<2 km height). Some of the Raman lidar observation could not be performed at bright daylight conditions. In these cases, we had to use Raman lidar measurements after sunset to check the non-dust aerosol type in the SAL.

#### 4 Lidar retrievals versus airborne in situ aerosol observations

We begin with comparisons of CCN concentrations ( $n_{\text{CCN}}$ ) in Sect. 4.1. Particle number concentrations  $n_{250}$  of large particles and surface area concentrations  $s$  are then compared in Sect. 4.2. In Sect. 4.3, we show simultaneous observed profiles of fine mode and coarse mode mass concentrations.

##### 4.1 CCN profiles

In Figure 3, the lidar-derived number concentration of CCN for dust  $n_{\text{CCN},d}$  (red line) and continental pollution particles  $n_{\text{CCN},c}$  (olive line) are presented. The total CCN number concentration  $n_{\text{CCN}}$  (black line, lidar) can be compared with measurements of the cloud condensation nuclei counter on board the Falcon aircraft (black dots) at the same supersaturation. In Table 5, the vertically averaged values are compared. The lidar-derived  $n_{\text{CCN}}$  values are up to twice as large as the in situ measured values. However, the lidar retrieval uncertainty is quite large (factor 2–3). **The retrieval uncertainty results from the uncertainty in determining the extinction-to-number-concentration conversion factor for small particles ( $r \geq 50$  nm or  $r \geq 100$  nm) using AERONET derived AOD and columnar number concentrations ( $n_{50}, n_{100}$ ) as described in Mamouri and Ansmann (2016).** Besides the large retrieval uncertainty, other uncertainty sources may have contributed to the systematic bias between the lidar and airborne in situ observations: (i) The lidar conversion factors are derived for AERONET stations close to the Sahara. These conversion factors may not be applicable to aged dust after long-range transport, and may overestimate the occurring accumulation mode dust particle number concentration and thus  $n_{100,d}$ . (ii) The used dust activation diameter ( $d_{\text{dry}}=200$  nm) may have been too low and the true one was much larger than 200 nm (see Table 3,  $d_{\text{dry}}=275$  nm **for dry-generated (fresh) dust**) and thus less dust particles were activated in the cloud condensation nuclei counter aboard the Falcon than estimated by lidar. (iii) Horizontal and temporal inhomogeneities in the dust concentration along the flight tracks and over the lidar site may have also contributed to the found differences. (iv) Although the Falcon data are corrected for the particles losses at the inlets (Spanu et al., 2019), there are several uncertainty sources in the in situ CCN **measurement**, that may have contributed to the found bias.

**Overall, the CCN number concentration for the three presented dust cases agrees within a factor of two between the in situ measurement and the lidar retrieval. As the behavior is the same for all three comparison studies, it is expected to be representative for Saharan dust episodes in the Caribbean.**

##### 4.2 INP-relevant aerosol profiles

In Figure 4a–c, the profiles of the sum of  $n_{250,d}$  and  $n_{250,c}$  are compared with the integral values of the particles number size distribution for  $r_{\text{dry}} > 250$  nm measured on board the Falcon aircraft. **The in situ values are transformed to the pressure and temperature at the measurement altitude to be comparable with the lidar observations.** As can be seen, the in situ and

lidar values agree well, except on 22 June and 11 July in the lower part of the SAL, where horizontal inhomogeneities in the dust load (see Fig. 2) may have partly caused the differences between the two measurements. The contribution of continental smoke and pollution aerosol to  $n_{250}$  was less than 3% in the SAL during the strong dust outbreak on 10–11 July 2013 and about 10% on 22 June 2013. In total, there were less than 40 particles ( $r_{\text{dry}} > 250$  nm) per  $\text{cm}^3$  in all three cases over the remote Atlantic.

Fig. 4d–f compares the profiles of the total surface area concentration **derived** from lidar extinction coefficients and from the airborne in situ measured number size distribution. Here, the contribution of the continental pollution particles to  $s$  within the SAL is 4–6% during the strong dust outbreak (10–11 July) and 20% on 22 June 2013. The lidar values are considerably larger than the in situ values. The use of too large conversion factors (based on AERONET observations close to the Sahara) may be one of the reasons for the strong disagreement.

**An example on INP profiling is given in Fig. 4g–h at a temperature of  $-25^\circ\text{C}$ . The DeMott et al. (2010) and DeMott et al. (2015) parameterization (including the correction factor of 3) is used with  $n_{250,\text{d}} + n_{250,\text{c}}$  and  $n_{250,\text{d}}$  profiles as input, respectively. Furthermore, the Harrison et al. (2019) parameterization for K-feldspar was added with a 1% contribution of K-feldspar to the dust surface area concentration as indicated by Kandler et al. (2018). The uncertainty range (factor 3) is exemplarily indicated for the DeMott et al. (2015) parameterization by the dashed line. As can be seen, the SAL contains INP concentrations of  $10\text{--}200 \text{ L}^{-1}$  at  $-25^\circ\text{C}$ .**

### 4.3 Fine and coarse mode mass concentrations

As an additional feature to the CCN and INP profiles, the dust mass concentration can be derived from the lidar measurements separately for fine and coarse mode dust (Table 1). The comparison with airborne in situ observations are shown in Fig. 5. The mass concentrations are calculated from the lidar derived and in situ measured volume concentration by assuming a dust mass density of  $2.6 \text{ g/cm}^3$ . An excellent agreement is obtained for the coarse mode. This indicates that the Falcon measurements capture well the large particles in the SAL (Spanu et al., 2019). The coarse-mode mass concentration from POLIPHON is around 16 times higher than the fine-mode mass concentration leading to a mass fine-mode fraction of 0.06. For the optical properties, such as the backscatter coefficient, the fine-mode fraction is 0.2. These mass (or volume) and backscatter fractions are in full agreement with simultaneous AERONET sun photometer observations of the fine-mode volume and AOD fractions at Ragged Point, Barbados. **Again, for the fine particle dominated quantities, i.e., the fine-mode mass concentration, the lidar derives higher values than observed in situ. Uncertainties in in situ aerosol measurements or in the lidar conversion factors might be the reason. However, a good agreement of the lidar products with AERONET observations is found and corroborates the quality of the lidar products.**

## 5 Contrasting pure dust with mixed dust–smoke and pristine marine conditions

We use the opportunity of SALTRACE to contrast the presented dust dominated cases during summer (SALTRACE-1) with a pristine marine measurement and a dust–smoke mixture during the SALTRACE-2 winter campaign (Haarig et al., 2017b). No aircraft measurements are available for SALTRACE-2.

### 5.1 Pristine marine conditions

Caribbean background cases without aerosol transport from Africa were found during SALTRACE-2. End of February 2014, pristine marine conditions prevailed at Barbados as already discussed in Haarig et al. (2017b). The 26 February 2014 was chosen for the present study as the influence of dry marine particles (Haarig et al., 2017b) was less pronounced as the days before (23 and 24 February 2014). The results are presented in Fig. 6. The marine aerosol reached 2 km height (Fig. 6a). The low values of PLDR ( $\leq 0.03$ ) shown in Fig. 6b increased at the top of the marine aerosol layer to values of 0.06 indicating the presence of dry marine particles with a non-spherical shape as discussed in Haarig et al. (2017b). These particles are misclassified as a very small dust contribution as can be seen in Fig. 6c for the CCN number concentration. Otherwise the CCN reservoir consists of marine aerosol only (up to 250 per  $\text{cm}^3$ ). The dashed line in Fig. 6c indicates the lidar-retrieved  $n_{\text{CCN}}$  from 3 March 2014 showing a similar behavior. The INP reservoir at  $-25^\circ\text{C}$  (Fig. 6d) derived with the parameterization of McCluskey et al. (2018) consists of 0.002–0.1 INP per L, which is around 3 orders of magnitude lower than in presence of Saharan dust. These findings from a remote sensing perspective show the influence of Saharan dust on the cloud properties in the Caribbean and are corroborated by previous helicopter-based in situ measurements in the framework of the CARRIBA project (Cloud, Aerosol, Radiation and turbulence in the trade wind regime over Barbados, Siebert et al., 2013). The marine background without aerosol long-range transport from Africa may be representative throughout the year for the marine contribution in the marine aerosol layer (below the temperature inversion at around 1.5–2.0 km). If dust is present in the SAL above, especially in summer, dust particles are mixed downwards in the marine aerosol layer and add to the marine (background) particles, significantly influencing the CCN and INP reservoir.

### 5.2 Dust–smoke mixture

A pronounced outbreak of aerosol from Africa reached Barbados in the beginning of March 2014. The trajectories ending at 2000 m above ground level on 3 March 2014 (not shown) point to the Sahara as dust source and West Africa (Senegal, Guinea) regarding the source region for biomass burning smoke. The transport across the Atlantic Ocean took around 2 weeks. We use the opportunity of the dust–smoke aerosol mixtures to highlight the strong impact of smoke on the CCN conditions. The transport of biomass burning smoke from Africa towards South America and the Caribbean during wintertime has been previously reported (Ansmann et al., 2009; Baars et al., 2011; Zuidema et al., 2018). An indication for the strong smoke contribution to the measured backscatter signal was the relatively low particle depolarization ratio ( $\leq 0.17$ ). Fine-mode smoke does not depolarize laser light (PLDR  $\leq 0.05$ ). Figure 7 gives an overview of the measurements on 3 March 2014. A lofted



layer (1.6–3.1 km height) of dust and smoke was found above the marine aerosol layer reaching to 1.6 km height. The vertical profiles in Fig. 7b and c show mean values for the time interval from 22:30 to 23:20 UTC. The particle backscatter coefficient (Fig. 7b) is separated into a dust component and a non-dust component using the PLDR separation technique as described in Sect. 2. To estimate whether the non-dust component is of marine or continental origin, the extinction coefficient was calculated from the different contributions to the backscatter coefficient as previously described in Sect. 2 and in Ansmann et al. (2017). The dust-related backscatter coefficient was multiplied by the dust lidar ratio ( $S_d=55$  sr), and the non-dust backscatter coefficient by the lidar ratio for marine particles ( $S_m=20$  sr, contributing to the blue curve in Fig. 7c) and for continental pollution particles ( $S_c=50$  sr, contributing to the green curve in Fig. 7c). The sum of the extinction coefficient (dust + marine and dust + continental) is then compared with the total extinction coefficient (black curve in Fig. 7c) derived independently with the Raman lidar method (Ansmann et al., 1992). As can be seen, the lofted aerosol layer obviously contains a mixture of dust and smoke, whereas the layer below is dominated by marine particles.

In the next step,  $n_{100,d}$ ,  $n_{50,c}$ , and  $n_{50,m}$  (Fig. 7d) are computed, and the resulting  $n_{CCN}$  (Fig. 7e) at 0.2% supersaturation is calculated. The continental pollution contribution to the CCN number concentration is 4 times stronger than the one from the dust aerosol. Thus, in the winter half year with significant smoke contribution from Africa, rather different CCN conditions are found across the Atlantic, leading to **likely changes in trade wind cumulus cloud microphysical properties** compared to the summer months when dust particles are dominating the CCN reservoir.

In contrast,  $n_{250}$  is dominated by mineral dust (Fig. 7f). The **lidar-derived** contributions to the surface area concentration (Fig. 7g) of dust and smoke are equal. The INP concentration at  $-25^\circ\text{C}$  estimated in Fig. 7h shows a weak contribution of marine particles (McCluskey et al., 2018) with 3–5 orders of magnitude less efficiency than the dust particles in the lofted layer. The immersion-freezing INP parameterizations based on  $n_{250}$  (DeMott et al., 2010, 2015) lead to values around  $10\text{ L}^{-1}$ . The results are added in Table 5.

Fig. 8 highlights the sensitive impact of smoke aerosol on the CCN concentration. The dust contribution to the optical properties (Fig. 8a) is almost 100% in summer during strong dust outbreaks and around 50% during the biomass burning season, which is in full agreement with AERONET observations. Dust dominates the aerosol mass concentration in the SAL (Fig. 8b) throughout the year, disregarding summer or winter conditions. In strong contrast, the smoke CCN concentration (Fig. 8c) **derived with lidar** strongly varies between summer and winter. CCN levels of  $200\text{--}300\text{ cm}^{-3}$  **are derived** during the strong dust outbreaks in summer (dust contribution around 80%), but close to  $500\text{ cm}^{-3}$  in the March 2014 event with a strong contribution of smoke particles (80%).

## 6 Summary and conclusion

**For the first time, we compared lidar-derived concentrations of CCN, particle number ( $n_{250}$ ) and total surface area concentration, and fine-mode and coarse-mode dust mass concentration with airborne in situ measurements in vertically deep plumes of aged mineral dust. The study was based on observations in the Saharan air layer over Barbados in the Caribbean, more than 5000 km west of the dust source in Africa. We found good agreement in the case of mass**

concentrations and large particle number concentrations ( $n_{250}$ ) which serves as input in the INP parameterizations of DeMott et al. (2010, 2015). Differences were observed regarding CCN concentrations. The reason for the differences could not be easily reconciled because many error sources can potentially contribute to the overall uncertainty. The assumptions in the lidar retrieval lead, e.g., to an uncertainty range within a factor of two. Considering this uncertainty, the agreement with the airborne CCN in situ observations is good. We applied several INP parameterization schemes available in literature. The range of solutions provided insight into the uncertainties in the lidar-based INP retrieval. In the case of fine-mode and coarse-mode mass concentrations an excellent agreement between the lidar and the in situ observations was obtained. This agreement demonstrates the capability of the airborne measurements to capture the large particles as well as the ability to derive accurate dust mass concentrations from lidar observations.

The dominating contribution of smoke particles to the CCN concentration in the wintertime SAL was demonstrated. Furthermore, a lidar observation during pure marine background conditions over Barbados in winter was discussed. At marine conditions the INP concentration is 2–3 orders of magnitude lower than during dusty conditions.

As an outlook, further comparisons of lidar and in situ airborne observations of aerosol microphysical properties, CCN and INP concentrations are required predominantly in complex aerosol mixtures of mineral dust and anthropogenic pollution to confirm the robustness of the lidar retrieval and the usefulness of the lidar products. We tested the lidar method for dust (and thus the coarse-mode dominated dust conversion factors) but in the next step we need to extend the studies towards complex aerosol mixtures including fine-mode dominated aerosol types such as smoke and urban pollution. Fine mode conversion factors are very different from the ones for dust. Our validation effort will be continued in the Eastern Mediterranean, where complex mixtures of anthropogenic haze, Middle Eastern and Saharan dust (partly aged and polluted, partly freshly emitted) are present. The simultaneous observations of a lidar in Limassol, Cyprus, and the Falcon aircraft performed in the framework of the A-LIFE campaign (Absorbing aerosol layers in a changing climate: aging, lifetime and dynamics) in April 2017 will be used for this study.

Once, the lidar retrievals are validated and refined by airborne in situ observations, cloud-relevant aerosol properties such as  $n_{\text{CCN}}$  and  $n_{\text{INP}}$  can be monitored with organized lidar networks such as the European Aerosol Research Lidar Network (EARLINET, Pappalardo et al., 2014), or continuously operating lidar systems in the framework of PollyNET (Baars et al., 2016). Furthermore, global lidar observations, e.g., from space with CALIPSO (Winker et al., 2009) and in future with EarthCARE (Illingworth et al., 2015) will benefit from the well tested CCN and INP lidar retrievals. Such datasets are needed for improved aerosol-cloud interaction studies and as input in weather and future climate predictions to better consider aerosol particles in respective modeling efforts.

## Author contribution

MH analyzed the lidar data, and performed together with DA and AA the lidar measurements. AW, together with MD, DS and BW performed the in situ measurements and analyzed the data. MH prepared the manuscript in close cooperation with AA and helpful comments and discussions of AW and BW. DF enabled the lidar measurements at the CIMH, Barbados.

- 5 *Acknowledgements.* This activity is supported by ACTRIS Research Infrastructure (EU H2020-R&I) under grant agreement number 654109 and by the European Research Council under the European Community's Horizon 2020 research and innovation framework program/ERC grant agreement number 640458 (A-LIFE). The logistical support of the Caribbean Institute for Meteorology and Hydrology (CIMH), Husbands, Barbados, should be acknowledged. **We thank the two anonymous reviewer for their time and effort put into the improvement of the manuscript. We especially thank Paul DeMott for the helpful comments and clarification to the parameterizations developed**
- 10 **by his group.**

## References

- Ansmann, A., Wandinger, U., Riebesell, M., Weitkamp, C., and Michaelis, W.: Independent measurement of extinction and backscatter profiles in cirrus clouds by using a combined Raman elastic-backscatter lidar, *Appl. Opt.*, 31, 7113–7131, doi:10.1364/AO.31.007113, 1992.
- 5 Ansmann, A., Baars, H., Tesche, M., Müller, D., Althausen, D., Engelmann, R., Pauliquevis, T., and Artaxo, P.: Dust and smoke transport from Africa to South America: Lidar profiling over Cape Verde and the Amazon rainforest, *Geophysical Research Letters*, 36, L11 802, doi:10.1029/2009GL037923, <http://dx.doi.org/10.1029/2009GL037923>, 2009.
- Ansmann, A., Rittmeister, F., Engelmann, R., Basart, S., Jorba, O., Spyrou, C., Remy, S., Skupin, A., Baars, H., Seifert, P., Senf, F., and Kanitz, T.: Profiling of Saharan dust from the Caribbean to western Africa – Part 2: Shipborne lidar measurements versus forecasts, *Atmospheric Chemistry and Physics*, 17, 14 987–15 006, doi:10.5194/acp-17-14987-2017, <https://www.atmos-chem-phys.net/17/14987/2017/>, 2017.
- 10 Ansmann, A., Mamouri, R.-E., Hofer, J., Baars, H., Althausen, D., and Abdullaev, S. F.: Dust mass, cloud condensation nuclei, and ice-nucleating particle profiling with polarization lidar: updated POLIPHON conversion factors from global AERONET analysis, *Atmospheric Measurement Techniques*, 12, 4849–4865, doi:10.5194/amt-12-4849-2019, <https://www.atmos-meas-tech.net/12/4849/2019/>, 2019.
- 15 Baars, H., Ansmann, A., Althausen, D., Engelmann, R., Artaxo, P., Pauliquevis, T., and Souza, R.: Further evidence for significant smoke transport from Africa to Amazonia, *Geophysical Research Letters*, 38, L20 802, doi:10.1029/2011GL049200, <http://dx.doi.org/10.1029/2011GL049200>, 2011.
- Baars, H., Kanitz, T., Engelmann, R., Althausen, D., Heese, B., Komppula, M., Preißler, J., Tesche, M., Ansmann, A., Wandinger, U., Lim, J.-H., Ahn, J. Y., Stachlewska, I. S., Amiridis, V., Marinou, E., Seifert, P., Hofer, J., Skupin, A., Schneider, F., Bohlmann, S., Foth, A., Bley, S., Pfüller, A., Giannakaki, E., Lihavainen, H., Viisanen, Y., Hooda, R. K., Pereira, S. N., Bortoli, D., Wagner, F., Mattis, I., Janicka, L., Markowicz, K. M., Achtert, P., Artaxo, P., Pauliquevis, T., Souza, R. A. F., Sharma, V. P., van Zyl, P. G., Beukes, J. P., Sun, J., Rohwer, E. G., Deng, R., Mamouri, R.-E., and Zamorano, F.: An overview of the first decade of PollyNET: an emerging network of automated Raman-polarization lidars for continuous aerosol profiling, *Atmospheric Chemistry and Physics*, 16, 5111–5137, doi:10.5194/acp-16-5111-2016, 2016.
- 25 Baumgardner, D., Jonsson, H., Dawson, W., O'Connor, D., and Newton, R.: The cloud, aerosol and precipitation spectrometer: a new instrument for cloud investigations, *Atmospheric Research*, 59-60, 251 – 264, doi:[https://doi.org/10.1016/S0169-8095\(01\)00119-3](https://doi.org/10.1016/S0169-8095(01)00119-3), <http://www.sciencedirect.com/science/article/pii/S0169809501001193>, 13th International Conference on Clouds and Precipitation, 2001.
- Brock, C. A., Cozic, J., Bahreini, R., Froyd, K. D., Middlebrook, A. M., McComiskey, A., Brioude, J., Cooper, O. R., Stohl, A., Aikin, K. C., de Gouw, J. A., Fahey, D. W., Ferrare, R. A., Gao, R.-S., Gore, W., Holloway, J. S., Hübler, G., Jefferson, A., Lack, D. A., Lance, S., Moore, R. H., Murphy, D. M., Nenes, A., Novelli, P. C., Nowak, J. B., Ogren, J. A., Peischl, J., Pierce, R. B., Pilewskie, P., Quinn, P. K., Ryerson, T. B., Schmidt, K. S., Schwarz, J. P., Sodemann, H., Spackman, J. R., Stark, H., Thomson, D. S., Thornberry, T., Veres, P., Watts, L. A., Warneke, C., and Wollny, A. G.: Characteristics, sources, and transport of aerosols measured in spring 2008 during the aerosol, radiation, and cloud processes affecting Arctic Climate (ARCPAC) Project, *Atmospheric Chemistry and Physics*, 11, 2423–2453, doi:10.5194/acp-11-2423-2011, <https://www.atmos-chem-phys.net/11/2423/2011/>, 2011.
- 30 Cai, Y., Montague, D. C., Mooiweer-Bryan, W., and Deshler, T.: Performance characteristics of the ultra high sensitivity aerosol spectrometer for particles between 55 and 800nm: Laboratory and field studies, *Journal of Aerosol Science*, 39, 759 – 769, doi:<https://doi.org/10.1016/j.jaerosci.2008.04.007>, <http://www.sciencedirect.com/science/article/pii/S0021850208000815>, 2008.
- 35

- DeMott, P. J., Prenni, A. J., Liu, X., Kreidenweis, S. M., Petters, M. D., Twohy, C. H., Richardson, M. S., Eidhammer, T., and Rogers, D. C.: Predicting global atmospheric ice nuclei distributions and their impacts on climate, *Proceedings of the National Academy of Sciences*, 107, 11 217–11 222, doi:10.1073/pnas.0910818107, 2010.
- DeMott, P. J., Prenni, A. J., McMeeking, G. R., Sullivan, R. C., Petters, M. D., Tobo, Y., Niemand, M., Möhler, O., Snider, J. R., Wang, Z.,  
5 and Kreidenweis, S. M.: Integrating laboratory and field data to quantify the immersion freezing ice nucleation activity of mineral dust particles, *Atmospheric Chemistry and Physics*, 15, 393–409, doi:10.5194/acp-15-393-2015, <http://www.atmos-chem-phys.net/15/393/2015/>, 2015.
- Denjean, C., Caquineau, S., Desboeufs, K., Laurent, B., Maille, M., Quiñones Rosado, M., Vallejo, P., Mayol-Bracero, O. L., and Formenti, P.: Long-range transport across the Atlantic in summertime does not enhance the hygroscopicity of African mineral dust, *Geophysical  
10 Research Letters*, 42, 7835–7843, doi:10.1002/2015GL065693, 2015.
- Düsing, S., Wehner, B., Seifert, P., Ansmann, A., Baars, H., Ditas, F., Henning, S., Ma, N., Poulain, L., Siebert, H., Wiedensohler, A., and Macke, A.: Helicopter-borne observations of the continental background aerosol in combination with remote sensing and ground-based measurements, *Atmospheric Chemistry and Physics*, 18, 1263–1290, doi:10.5194/acp-18-1263-2018, <https://www.atmos-chem-phys.net/18/1263/2018/>, 2018.
- 15 Freudenthaler, V., Esselborn, M., Wiegner, M., Heese, B., Tesche, M., Ansmann, A., Müller, D., Althausen, D., Wirth, M., Fix, A., Ehret, G., Knippertz, P., Toledano, C., Gasteiger, J., Garhammer, M., and Seefeldner, M.: Depolarization ratio profiling at several wavelengths in pure Saharan dust during SAMUM 2006, *Tellus B*, 61, 165–179, doi:10.1111/j.1600-0889.2008.00396.x, 2009.
- Gasteiger, J., Groß, S., Sauer, D., Haarig, M., Ansmann, A., and Weinzierl, B.: Particle settling and vertical mixing in the Saharan Air Layer as seen from an integrated model, lidar, and in situ perspective, *Atmospheric Chemistry and Physics*, 17, 297–311,  
20 doi:10.5194/acp-17-297-2017, 2017.
- Groß, S., Esselborn, M., Weinzierl, B., Wirth, M., Fix, A., and Petzold, A.: Aerosol classification by airborne high spectral resolution lidar observations, *Atmospheric Chemistry and Physics*, 13, 2487–2505, doi:10.5194/acp-13-2487-2013, <https://www.atmos-chem-phys.net/13/2487/2013/>, 2013.
- Groß, S., Freudenthaler, V., Schepanski, K., Toledano, C., Schäfler, A., Ansmann, A., and Weinzierl, B.: Optical properties of long-range  
25 transported Saharan dust over Barbados as measured by dual-wavelength depolarization Raman lidar measurements, *Atmospheric Chemistry and Physics*, 15, 11 067–11 080, doi:10.5194/acp-15-11067-2015, <https://www.atmos-chem-phys.net/15/11067/2015/>, 2015.
- Haarig, M., Engelmann, R., Ansmann, A., Veselovskii, I., Whiteman, D. N., and Althausen, D.: 1064 nm rotational Raman lidar for particle extinction and lidar-ratio profiling: cirrus case study, *Atmospheric Measurement Techniques*, 9, 4269–4278, doi:10.5194/amt-9-4269-2016, <https://www.atmos-meas-tech.net/9/4269/2016/>, 2016.
- 30 Haarig, M., Ansmann, A., Althausen, D., Klepel, A., Groß, S., Freudenthaler, V., Toledano, C., Mamouri, R.-E., Farrell, D. A., Prescod, D. A., Marinou, E., Burton, S. P., Gasteiger, J., Engelmann, R., and Baars, H.: Triple-wavelength depolarization-ratio profiling of Saharan dust over Barbados during SALTRACE in 2013 and 2014, *Atmospheric Chemistry and Physics*, 17, 10 767–10 794, doi:10.5194/acp-17-10767-2017, <https://www.atmos-chem-phys.net/17/10767/2017/>, 2017a.
- Haarig, M., Ansmann, A., Gasteiger, J., Kandler, K., Althausen, D., Baars, H., Radenz, M., and Farrell, D. A.: Dry versus wet  
35 marine particle optical properties: RH dependence of depolarization ratio, backscatter, and extinction from multiwavelength lidar measurements during SALTRACE, *Atmospheric Chemistry and Physics*, 17, 14 199–14 217, doi:10.5194/acp-17-14199-2017, <https://www.atmos-chem-phys.net/17/14199/2017/>, 2017b.

- Harrison, A. D., Lever, K., Sanchez-Marroquin, A., Holden, M. A., Whale, T. F., Tarn, M. D., McQuaid, J. B., and Murray, B. J.: The ice-nucleating ability of quartz immersed in water and its atmospheric importance compared to K-feldspar, *Atmospheric Chemistry and Physics*, 19, 11 343–11 361, doi:10.5194/acp-19-11343-2019, <https://www.atmos-chem-phys.net/19/11343/2019/>, 2019.
- Herich, H., Tritscher, T., Wiacek, A., Gysel, M., Weingartner, E., Lohmann, U., Baltensperger, U., and Cziczo, D. J.: Water uptake of  
5 clay and desert dust aerosol particles at sub- and supersaturated water vapor conditions, *Phys. Chem. Chem. Phys.*, 11, 7804–7809, doi:10.1039/B901585J, <http://dx.doi.org/10.1039/B901585J>, 2009.
- Holben, B., Eck, T., Slutsker, I., Tanré, D., Buis, J., Setzer, A., Vermote, E., Reagan, J., Kaufman, Y., Nakajima, T., Lavenu, F., Jankowiak, I., and Smirnov, A.: AERONET—A Federated Instrument Network and Data Archive for Aerosol Characterization, *Remote Sensing of Environment*, 66, 1 – 16, doi:[http://dx.doi.org/10.1016/S0034-4257\(98\)00031-5](http://dx.doi.org/10.1016/S0034-4257(98)00031-5),  
10 <http://www.sciencedirect.com/science/article/pii/S0034425798000315>, 1998.
- Illingworth, A. J., Barker, H. W., Beljaars, A., Ceccaldi, M., Chepfer, H., Clerbaux, N., Cole, J., Delanoë, J., Domenech, C., Donovan, D. P., Fukuda, S., Hiraoka, M., Hogan, R. J., Huenerbein, A., Kollias, P., Kubota, T., Nakajima, T., Nakajima, T. Y., Nishizawa, T., Ohno, Y., Okamoto, H., Oki, R., Sato, K., Satoh, M., Shephard, M. W., Velázquez-Blázquez, A., Wandinger, U., Wehr, T., and van Zadelhoff, G.-J.: The EarthCARE Satellite: The Next Step Forward in Global Measurements of Clouds, Aerosols, Precipitation, and Radiation, *Bulletin of the American Meteorological Society*, 96, 1311–1332, doi:10.1175/BAMS-D-12-00227.1, 2015.  
15
- IPCC: Climate Change 2013: The Physical Science Basis. Contribution of Working Group 1 to the Fifth Assessment Report of the Intergovernmental Panel on Climate Change, Cambridge University Press, New York, USA, <http://www.ipcc.ch/report/ar5/>, last access: 14th December, 2017, 2013.
- Jung, E., Albrecht, B. A., Feingold, G., Jonsson, H. H., Chuang, P., and Donaher, S. L.: Aerosols, clouds, and precipitation in the North  
20 Atlantic trades observed during the Barbados aerosol cloud experiment – Part 1: Distributions and variability, *Atmospheric Chemistry and Physics*, 16, 8643–8666, doi:10.5194/acp-16-8643-2016, <https://www.atmos-chem-phys.net/16/8643/2016/>, 2016.
- Kandler, K., Schneiders, K., Ebert, M., Hartmann, M., Weinbruch, S., Prass, M., and Pöhlker, C.: Composition and mixing state of atmospheric aerosols determined by electron microscopy: method development and application to aged Saharan dust deposition in the Caribbean boundary layer, *Atmospheric Chemistry and Physics*, 18, 13 429–13 455, doi:10.5194/acp-18-13429-2018,  
25 <https://www.atmos-chem-phys.net/18/13429/2018/>, 2018.
- Koehler, K. A., Kreidenweis, S. M., DeMott, P. J., Petters, M. D., Prenni, A. J., and Carrico, C. M.: Hygroscopicity and cloud droplet activation of mineral dust aerosol, *Geophysical Research Letters*, 36, doi:10.1029/2009GL037348, <https://agupubs.onlinelibrary.wiley.com/doi/abs/10.1029/2009GL037348>, 2009.
- Kristensen, T. B., Wex, H., Nekat, B., Nojgaard, J. K., van Pinxteren, D., Lowenthal, D. H., Mazzoleni, L. R., Dieckmann, K., Bender Koch, C., Mentel, T. F., Herrmann, H., Gannet Hallar, A., Stratmann, F., and Bilde, M.: Hygroscopic growth and CCN activity of HULIS from different environments, *J. Geophys. Res.*, 117, doi:10.1029/2012jd018249, <https://doi.org/10.1029/2012JD018249>, 2012.  
30
- Kristensen, T. B., Müller, T., Kandler, K., Benker, N., Hartmann, M., Prospero, J. M., Wiedensohler, A., and Stratmann, F.: Properties of cloud condensation nuclei (CCN) in the trade wind marine boundary layer of the western North Atlantic, *Atmospheric Chemistry and Physics*, 16, 2675–2688, doi:10.5194/acp-16-2675-2016, <http://www.atmos-chem-phys.net/16/2675/2016/>, 2016.
- Kumar, P., Sokolik, I. N., and Nenes, A.: Measurements of cloud condensation nuclei activity and droplet activation kinetics of fresh un-processed regional dust samples and minerals, *Atmospheric Chemistry and Physics*, 11, 3527–3541, doi:10.5194/acp-11-3527-2011, <https://www.atmos-chem-phys.net/11/3527/2011/>, 2011a.  
35

- Kumar, P., Sokolik, I. N., and Nenes, A.: Cloud condensation nuclei activity and droplet activation kinetics of wet processed regional dust samples and minerals, *Atmospheric Chemistry and Physics*, 11, 8661–8676, doi:10.5194/acp-11-8661-2011, <https://www.atmos-chem-phys.net/11/8661/2011/>, 2011b.
- Kupc, A., Williamson, C., Wagner, N. L., Richardson, M., and Brock, C. A.: Modification, calibration, and performance of the  
5 Ultra-High Sensitivity Aerosol Spectrometer for particle size distribution and volatility measurements during the Atmospheric Tomography Mission (ATom) airborne campaign, *Atmospheric Measurement Techniques*, 11, 369–383, doi:10.5194/amt-11-369-2018, <https://www.atmos-meas-tech.net/11/369/2018/>, 2018.
- Lance, S., Nenes, A., Medina, J., and Smith, J. N.: Mapping the Operation of the DMT Continuous Flow CCN Counter, *Aerosol Science and Technology*, 40, 242–254, doi:10.1080/02786820500543290, <https://doi.org/10.1080/02786820500543290>, 2006.
- 10 Lieke, K., Kandler, K., Scheuvsens, D., Emmel, C., Von Glahn, C., Petzold, A., Weinzierl, B., Veira, A., Ebert, M., Weinbruch, S., and Schütz, L.: Particle chemical properties in the vertical column based on aircraft observations in the vicinity of Cape Verde Islands, *Tellus B*, 63, 497–511, doi:10.1111/j.1600-0889.2011.00553.x, 2011.
- 15 Lv, M., Wang, Z., Li, Z., Luo, T., Ferrare, R., Liu, D., Wu, D., Mao, J., Wan, B., Zhang, F., and Wang, Y.: Retrieval of Cloud Condensation Nuclei Number Concentration Profiles From Lidar Extinction and Backscatter Data, *Journal of Geophysical Research: Atmospheres*, 123, 6082–6098, doi:10.1029/2017JD028102, <https://agupubs.onlinelibrary.wiley.com/doi/abs/10.1029/2017JD028102>, 2018.
- Mamouri, R. E. and Ansmann, A.: Fine and coarse dust separation with polarization lidar, *Atmospheric Measurement Techniques*, 7, 3717–3735, doi:10.5194/amt-7-3717-2014, <https://www.atmos-meas-tech.net/7/3717/2014/>, 2014.
- Mamouri, R. E. and Ansmann, A.: Estimated desert-dust ice nuclei profiles from polarization lidar: methodology and case studies, *Atmospheric Chemistry and Physics*, 15, 3463–3477, doi:10.5194/acp-15-3463-2015, 2015.
- 20 Mamouri, R.-E. and Ansmann, A.: Potential of polarization lidar to provide profiles of CCN- and INP-relevant aerosol parameters, *Atmospheric Chemistry and Physics*, 16, 5905–5931, doi:10.5194/acp-16-5905-2016, <https://www.atmos-chem-phys.net/16/5905/2016/>, 2016.
- Mamouri, R.-E. and Ansmann, A.: Potential of polarization/Raman lidar to separate fine dust, coarse dust, maritime, and anthropogenic aerosol profiles, *Atmospheric Measurement Techniques*, 10, 3403–3427, doi:10.5194/amt-10-3403-2017, <https://www.atmos-meas-tech.net/10/3403/2017/>, 2017.
- 25 Marinou, E., Tesche, M., Nenes, A., Ansmann, A., Schrod, J., Mamali, D., Tsekeri, A., Pikridas, M., Baars, H., Engelmann, R., Voudouri, K.-A., Solomos, S., Sciare, J., Groß, S., Ewald, F., and Amiridis, V.: Retrieval of ice-nucleating particle concentrations from lidar observations and comparison with UAV in situ measurements, *Atmospheric Chemistry and Physics*, 19, 11 315–11 342, doi:10.5194/acp-19-11315-2019, <https://www.atmos-chem-phys.net/19/11315/2019/>, 2019.
- 30 McCluskey, C. S., Ovadnevaite, J., Rinaldi, M., Atkinson, J., Belosi, F., Ceburnis, D., Marullo, S., Hill, T. C. J., Lohmann, U., Kanji, Z. A., O’Dowd, C., Kreidenweis, S. M., and DeMott, P. J.: Marine and Terrestrial Organic Ice-Nucleating Particles in Pristine Marine to Continentally Influenced Northeast Atlantic Air Masses, *J. Geophys. Res. Atmos.*, 123, 6196–6212, doi:10.1029/2017JD028033, <https://doi.org/10.1029/2017JD028033>, 2018.
- Müller, D., Ansmann, A., Mattis, I., Tesche, M., Wandinger, U., Althausen, D., and Pisani, G.: Aerosol-type-dependent lidar ratios observed with Raman lidar, *Journal of Geophysical Research: Atmospheres*, 112, D16 202, doi:10.1029/2006JD008292, <http://dx.doi.org/10.1029/2006JD008292>, 2007.
- 35 Niemand, M., Möhler, O., Vogel, B., Vogel, H., Hoose, C., Connolly, P., Klein, H., Bingemer, H., DeMott, P., Skrotzki, J., and Leisner, T.: A Particle-Surface-Area-Based Parameterization of Immersion Freezing on Desert Dust Particles, *Journal of the Atmospheric Sciences*, 69, 3077–3092, doi:10.1175/JAS-D-11-0249.1, <http://dx.doi.org/10.1175/JAS-D-11-0249.1>, 2012.

- Pappalardo, G., Amodeo, A., Apituley, A., Comeron, A., Freudenthaler, V., Linné, H., Ansmann, A., Bösenberg, J., D'Amico, G., Mattis, I., Mona, L., Wandinger, U., Amiridis, V., Alados-Arboledas, L., Nicolae, D., and Wiegner, M.: EARLINET: towards an advanced sustainable European aerosol lidar network, *Atmospheric Measurement Techniques*, 7, 2389–2409, doi:10.5194/amt-7-2389-2014, 2014.
- Petters, M. D. and Kreidenweis, S. M.: A single parameter representation of hygroscopic growth and cloud condensation nucleus activity, *Atmospheric Chemistry and Physics*, 7, 1961–1971, doi:10.5194/acp-7-1961-2007, <https://www.atmos-chem-phys.net/7/1961/2007/>, 2007.
- Petters, M. D., Carrico, C. M., Kreidenweis, S. M., Prenni, A. J., DeMott, P. J., Collett Jr., J. L., and Moosmüller, H.: Cloud condensation nucleation activity of biomass burning aerosol, *J. Geophys. Res.*, 114, doi:10.1029/2009jd012353, <https://doi.org/10.1029/2009JD012353>, 2009.
- 10 Price, H. C., Baustian, K. J., McQuaid, J. B., Blyth, A., Bower, K. N., Choularton, T., Cotton, R. J., Cui, Z., Field, P. R., Gallagher, M., Hawker, R., Merrington, A., Miltenberger, A., Neely III, R. R., Parker, S. T., Rosenberg, P. D., Taylor, J. W., Trembath, J., Vergara-Temprado, J., Whale, T. F., Wilson, T. W., Young, G., and Murray, B. J.: Atmospheric Ice-Nucleating Particles in the Dusty Tropical Atlantic, *Journal of Geophysical Research: Atmospheres*, 123, 2175–2193, doi:10.1002/2017JD027560, <https://agupubs.onlinelibrary.wiley.com/doi/abs/10.1002/2017JD027560>, 2018.
- 15 Roberts, G. C. and Nenes, A.: A Continuous-Flow Streamwise Thermal-Gradient CCN Chamber for Atmospheric Measurements, *Aerosol Science and Technology*, 39, 206–221, doi:10.1080/027868290913988, <https://doi.org/10.1080/027868290913988>, 2005.
- Sawamura, P., Moore, R. H., Burton, S. P., Chemyakin, E., Müller, D., Kolgotin, A., Ferrare, R. A., Hostetler, C. A., Ziemba, L. D., Beyersdorf, A. J., and Anderson, B. E.: HSRL-2 aerosol optical measurements and microphysical retrievals vs. airborne in situ measurements during DISCOVER-AQ 2013: an intercomparison study, *Atmospheric Chemistry and Physics*, 17, 7229–7243, doi:10.5194/acp-17-7229-2017, <https://www.atmos-chem-phys.net/17/7229/2017/>, 2017.
- 20 Schrod, J., Weber, D., Drücke, J., Keleshis, C., Pikridas, M., Ebert, M., Cvetković, B., Nickovic, S., Marinou, E., Baars, H., Ansmann, A., Vrekoussis, M., Mihalopoulos, N., Sciare, J., Curtius, J., and Bingemer, H. G.: Ice nucleating particles over the Eastern Mediterranean measured by unmanned aircraft systems, *Atmospheric Chemistry and Physics*, 17, 4817–4835, doi:10.5194/acp-17-4817-2017, <https://www.atmos-chem-phys.net/17/4817/2017/>, 2017.
- 25 Shinozuka, Y., Clarke, A. D., Nenes, A., Jefferson, A., Wood, R., McNaughton, C. S., Ström, J., Tunved, P., Redemann, J., Thornhill, K. L., Moore, R. H., Latham, T. L., Lin, J. J., and Yoon, Y. J.: The relationship between cloud condensation nuclei (CCN) concentration and light extinction of dried particles: indications of underlying aerosol processes and implications for satellite-based CCN estimates, *Atmospheric Chemistry and Physics*, 15, 7585–7604, doi:10.5194/acp-15-7585-2015, <https://www.atmos-chem-phys.net/15/7585/2015/>, 2015.
- 30 Siebert, H., Beals, M., Bethke, J., Bierwirth, E., Conrath, T., Dieckmann, K., Ditas, F., Ehrlich, A., Farrell, D., Hartmann, S., Iza-guirre, M. A., Katzwinkel, J., Nuijens, L., Roberts, G., Schäfer, M., Shaw, R. A., Schmeissner, T., Serikov, I., Stevens, B., Stratmann, F., Wehner, B., Wendisch, M., Werner, F., and Wex, H.: The fine-scale structure of the trade wind cumuli over Barbados &ndash; an introduction to the CARRIBA project, *Atmospheric Chemistry and Physics*, 13, 10061–10077, doi:10.5194/acp-13-10061-2013, <https://www.atmos-chem-phys.net/13/10061/2013/>, 2013.
- 35 Spanu, A., Dollner, M., Gasteiger, J., Bui, T. P., and Weinzierl, B.: Flow-induced errors in airborne in-situ measurements of aerosols and clouds, *Atmospheric Measurement Techniques Discussions*, 2019, 1–46, doi:10.5194/amt-2019-27, <https://www.atmos-meas-tech-discuss.net/amt-2019-27/>, 2019.



- Steinke, I., Hoose, C., Möhler, O., Connolly, P., and Leisner, T.: A new temperature- and humidity-dependent surface site density approach for deposition ice nucleation, *Atmospheric Chemistry and Physics*, 15, 3703–3717, doi:10.5194/acp-15-3703-2015, <http://www.atmos-chem-phys.net/15/3703/2015/>, 2015.
- 5 Tobo, Y., Prenni, A. J., DeMott, P. J., Huffman, J. A., McCluskey, C. S., Tian, G., Pöhlker, C., Pöschl, U., and Kreidenweis, S. M.: Biological aerosol particles as a key determinant of ice nuclei populations in a forest ecosystem, *J. Geophys. Res. Atmos.*, 118, 10,100–10,110, doi:10.1002/jgrd.50801, <https://doi.org/10.1002/jgrd.50801>, 2013.
- Twohy, C. H., Kreidenweis, S. M., Eidhammer, T., Browell, E. V., Heymsfield, A. J., Bansemer, A. R., Anderson, B. E., Chen, G., Ismail, S., DeMott, P. J., and Van Den Heever, S. C.: Saharan dust particles nucleate droplets in eastern Atlantic clouds, *Geophysical Research Letters*, 36, L01 807, doi:10.1029/2008GL035846, <http://dx.doi.org/10.1029/2008GL035846>, 101807, 2009.
- 10 Ullrich, R., Hoose, C., Möhler, O., Niemand, M., Wagner, R., Höhler, K., Hiranuma, N., Saathoff, H., and Leisner, T.: A New Ice Nucleation Active Site Parameterization for Desert Dust and Soot, *Journal of the Atmospheric Sciences*, 74, 699–717, doi:10.1175/JAS-D-16-0074.1, <https://doi.org/10.1175/JAS-D-16-0074.1>, 2017.
- Walser, A., Sauer, D., Spanu, A., Gasteiger, J., and Weinzierl, B.: On the parametrization of optical particle counter response including instrument-induced broadening of size spectra and a self-consistent evaluation of calibration measurements, *Atmospheric Measurement*
- 15 *Techniques*, 10, 4341–4361, doi:10.5194/amt-10-4341-2017, <https://www.atmos-meas-tech.net/10/4341/2017/>, 2017.
- Weinzierl, B., Ansmann, A., Prospero, J. M., Althausen, D., Benker, N., Chouza, F., Dollner, M., Farrell, D., Fomba, W. K., Freudenthaler, V., Gasteiger, J., Groß, S., Haarig, M., Heinold, B., Kandler, K., Kristensen, T. B., Mayol-Bracero, O. L., Müller, T., Reitebuch, O., Sauer, D., Schäfler, A., Schepanski, K., Spanu, A., Tegen, I., Toledano, C., and Walser, A.: The Saharan Aerosol Long-range Transport and Aerosol-Cloud-Interaction Experiment (SALTRACE): overview and selected highlights, *Bulletin of the American Meteorological*
- 20 *Society*, 98, 1427–1451, doi:10.1175/BAMS-D-15-00142.1, <http://journals.ametsoc.org/doi/abs/10.1175/BAMS-D-15-00142.1>, 2017.
- Wex, H., Dieckmann, K., Roberts, G. C., Conrath, T., Izaguirre, M. A., Hartmann, S., Herenz, P., Schäfer, M., Ditas, F., Schmeissner, T., Henning, S., Wehner, B., Siebert, H., and Stratmann, F.: Aerosol arriving on the Caribbean island of Barbados: physical properties and origin, *Atmospheric Chemistry and Physics*, 16, 14 107–14 130, doi:10.5194/acp-16-14107-2016, <http://www.atmos-chem-phys.net/16/14107/2016/>, 2016.
- 25 Winker, D. M., Vaughan, M. A., Omar, A., Hu, Y., Powell, K. A., Liu, Z., Hunt, W. H., and Young, S. A.: Overview of the CALIPSO Mission and CALIOP Data Processing Algorithms, *Journal of Atmospheric and Oceanic Technology*, 26, 2310–2323, doi:10.1175/2009JTECHA1281.1, <http://dx.doi.org/10.1175/2009JTECHA1281.1>, 2009.
- Zuidema, P., Sedlacek III, A. J., Flynn, C., Springston, S., Delgadillo, R., Zhang, J., Aiken, A. C., Koontz, A., and Muradyan, P.: The Ascension Island Boundary Layer in the Remote Southeast Atlantic is Often Smoky, *Geophys. Res. Lett.*, 45, 4456–4465, doi:10.1002/2017GL076926, <https://doi.org/10.1002/2017GL076926>, 2018.
- 30

**Table 1.** List of abbreviations, formulas and uncertainties for the lidar-derived input parameter to estimate CCN and INP number concentrations (Mamouri and Ansmann, 2016) and for the separation of fine and coarse mode mass concentration (Mamouri and Ansmann, 2017). For Saharan dust the updated conversion factors of Ansmann et al. (2019) are used. All conversion factors are given for a lidar wavelength of 532 nm. In the following, the indices  $d$ ,  $c$ , and  $m$  represent the aerosol types dust ( $df$  – fine mode ( $r < 500$  nm),  $dc$  – coarse mode dust ( $r > 500$  nm)), continental and marine particles, respectively. The extinction coefficient is calculated as the product of the lidar ratio  $S_i$  ( $S_d=55$  sr,  $S_c=50$  sr,  $S_m=20$  sr) and the backscatter coefficient  $\beta_i$  of the aerosol component  $i$ . NC and MC stand for particle number concentration and mass concentration, respectively. The density  $\rho_d$  of dust is  $2.6 \text{ g/cm}^3$ .

| Symbol      | Name                                | Formula                                                                                                                                                                                                                | Unit                            | Uncertainty |
|-------------|-------------------------------------|------------------------------------------------------------------------------------------------------------------------------------------------------------------------------------------------------------------------|---------------------------------|-------------|
| $M_{df}$    | fine mode dust MC ( $r < 500$ nm)   | $= \rho_d c_{v,df}(S_d \beta_{df})$<br>with $c_{v,df} = 0.22 \cdot 10^{-12} \text{ Mm}$                                                                                                                                | $\mu\text{g m}^{-3}$            | 40–60%      |
| $M_{dc}$    | coarse mode dust MC ( $r > 500$ nm) | $= \rho_d c_{v,dc}(S_d \beta_{dc})$<br>with $c_{v,dc} = 0.8 \cdot 10^{-12} \text{ Mm}$                                                                                                                                 | $\mu\text{g m}^{-3}$            | 25–35%      |
| $n_{50,c}$  | NC with $r_{dry} > 50$ nm (cont.)   | $= c_{60,c} (S_c \beta_c)^{\chi_d}$<br>with $c_{60,c} = 12.7 \text{ cm}^{-3} *$ , $\chi_c = 0.94$                                                                                                                      | $\text{cm}^{-3}$                | Factor of 2 |
| $n_{50,m}$  | NC with $r_{dry} > 50$ nm (marine)  | $= c_{100,m} (S_m \beta_m)^{\chi_m}$<br>with $c_{100,m} = 7.2 \text{ cm}^{-3} *$ , $\chi_m = 0.85$                                                                                                                     | $\text{cm}^{-3}$                | Factor of 2 |
| $n_{100,d}$ | NC with $r_{dry} > 100$ nm (dust)   | $= c_{100,d} (S_d \beta_d)^{\chi_d}$<br>with $c_{100,d} = 4.12 \text{ cm}^{-3} *$ , $\chi_d = 0.83$                                                                                                                    | $\text{cm}^{-3}$                | Factor of 2 |
| $n_{250}$   | NC with $r_{dry} > 250$ nm          | $= c_{250,i} (S_i \beta_i)$<br>with $c_{250,d} = 0.19 \text{ Mm cm}^{-3}$<br>$c_{290,c} = 0.10 \text{ Mm cm}^{-3}$<br>$c_{500,m} = 0.06 \text{ Mm cm}^{-3}$                                                            | $\text{cm}^{-3}$                | 30%         |
| $s$         | surface area concentration          | $= c_{s,i} (S_i \beta_i)$<br>with $c_{s,d} = 2.4 \text{ Mm } \mu\text{m}^2 \text{ cm}^{-3}$<br>$c_{s,c} = 2.8 \text{ Mm } \mu\text{m}^2 \text{ cm}^{-3}$<br>$c_{s,m} = 0.63 \text{ Mm } \mu\text{m}^2 \text{ cm}^{-3}$ | $\mu\text{m}^2 \text{ cm}^{-3}$ | 30–50%      |
| $n_{CCN}$   | NC of CCN                           | $= f_{ss,d} n_{100,d} + f_{ss,c} n_{50,c} + f_{ss,m} n_{50,m}$<br>with $f_{0.2\%,i} = 1.0$                                                                                                                             | $\text{cm}^{-3}$                | Factor of 2 |
| $n_{INP}$   | NC of INP                           | see literature in Table 2                                                                                                                                                                                              | $\text{L}^{-1}$                 | Factor of 3 |

\* for an extinction coefficient of  $1 \text{ Mm}^{-1}$

**Table 2.** The INP parameterizations for immersion freezing with their references and valid temperature intervals. In the case of immersion freezing, ice nucleation starts via an INP immersed into a liquid droplet.

|             | Reference                      | Temp. (K)     | Input          | Comments                |
|-------------|--------------------------------|---------------|----------------|-------------------------|
| D10         | DeMott et al. (2010)           | 238 – 264     | $n_{250,c}, T$ | <b>all aerosol</b>      |
| D15d        | DeMott et al. (2015)           | 238 – 252     | $n_{250,d}, T$ | dust                    |
| <b>H19d</b> | <b>Harrison et al. (2019)</b>  | 235.5 – 269.5 | $s_d, T$       | <b>dust, K-Feldspar</b> |
| U17d        | Ullrich et al. (2017)          | 243 – 259     | $s_d, T$       | dust                    |
| U17c        | Ullrich et al. (2017)          | 237 – 255     | $s_c, T$       | soot                    |
| <b>M18m</b> | <b>McCluskey et al. (2018)</b> | 245 – 263     | $s_m, T$       | <b>marine aerosol</b>   |

**Table 3.** Dry activation diameter  $d_{\text{act}}$  for various chemical compositions calculated with kappa-Köhler theory (Petters and Kreidenweis, 2007). The  $\kappa$  values are estimated from literature (Ko09 – Koehler et al. (2009), He09 – Herich et al. (2009), Ku11a – Kumar et al. (2011a), Ku11b – Kumar et al. (2011b), Pe&Kr07 – Petters and Kreidenweis (2007), Pe09 – Petters et al. (2009), Kr12 – Kristensen et al. (2012)). The uncertainty in  $\kappa$  **can be considerable**, especially for Saharan dust and organics.

| Material                          | $\kappa$ | Reference                | $d_{\text{act}}(-10^\circ\text{C})$<br>nm | $d_{\text{act}}(0^\circ\text{C})$<br>nm | $d_{\text{act}}(10^\circ\text{C})$<br>nm | $d_{\text{act}}(20^\circ\text{C})$<br>nm |
|-----------------------------------|----------|--------------------------|-------------------------------------------|-----------------------------------------|------------------------------------------|------------------------------------------|
| <b>Dry-generated Saharan dust</b> | 0.02     | Ko09, He09, Ku11a, Ku11b | 307                                       | 290                                     | 275                                      | 261                                      |
| <b>Wet-generated Saharan dust</b> | 0.30     | Ko09, He09, Ku11a, Ku11b | 126                                       | 119                                     | 113                                      | 107                                      |
| Ammonium sulfate                  | 0.61     | Pe&Kr07                  | 100                                       | 94                                      | 89                                       | 85                                       |
| Ammonium nitrate                  | 0.67     | Pe&Kr07                  | 97                                        | 91                                      | 87                                       | 82                                       |
| <b>Low-hygroscopic organics</b>   | 0.05     | Pe&Kr07, Pe09, Kr12      | 228                                       | 216                                     | 204                                      | 194                                      |
| <b>Hygroscopic organics</b>       | 0.30     | Pe&Kr07, Pe09, Kr12      | 126                                       | 119                                     | 113                                      | 107                                      |
| Sodium chloride                   | 1.28     | Pe&Kr07                  | 78                                        | 74                                      | 70                                       | 66                                       |

**Table 4.** Lidar and Falcon aircraft measurement periods. The mean distance (with standard deviation) of the Falcon from the lidar observation site is given. Local radiosonde launches provide the wind direction (WD) and wind speed (WS) at the altitude of Falcon aircraft.

| Date         | Falcon observation |             | Lidar observation | Distance | WD  | WS   |
|--------------|--------------------|-------------|-------------------|----------|-----|------|
|              | Height asl.(m)     | Time (UTC)  | Time (UTC)        | km       | °   | m/s  |
| 22 June 2013 | 2238               | 20:11–20:50 | 19:28–21:20       | 91±60    | 113 | 9.9  |
|              | 3369               | 19:28–20:08 | 19:28–21:20       | 94±62    | 51  | 1.0  |
| 10 July 2013 | 2594               | 16:46–16:55 | 17:01–19:25       | 130±100* | 100 | 18.0 |
|              | 3560               | 18:12–18:21 | 17:01–19:25       | 20±7     | 93  | 17.9 |
|              | 4204               | 17:52–18:10 | 17:01–19:25       | 66±45    | 89  | 14.5 |
|              | 4369               | 16:30–16:40 | 17:01–19:25       | 220±2    | 93  | 13.8 |
| 11 July 2013 | 2102               | 14:02–14:13 | 12:40–14:20       | 38±7     | 73  | 12.8 |
|              | 2590               | 13:51–14:01 | 12:40–14:20       | 22±13    | 71  | 12.8 |
|              | 4196               | 13:39–13:47 | 12:40–14:20       | 17±11    | 64  | 14.7 |

\* consists of two measurement periods, one around 220 km away (16:46–16:55 UTC) and one around 30 km away (18:23–18:32 UTC)

**Table 5.** Layer mean CCN and INP concentrations ( $n_{CCN}$ ,  $n_{INP}$ ) in the upper (>3 km) and lower (2–3 km) part of the SAL from lidar and Falcon ( $n_{CCN}$  only). The standard deviation of the layer mean is given. The uncertainty range for the lidar retrieval is a factor of 2 for  $n_{CCN}$  and 3 for  $n_{INP}$  (not indicated). The immersion freezing INP parameterization of D15d for dust at a constant temperature is used to give an estimate. CCN concentrations are given for 0.2% water supersaturation (ss).  $n_{CCN}$  and  $n_{INP}$  values for the observed dust–smoke mixture **and the pure marine conditions (INP from M18m)** measured at Barbados on 3 March 2014 and 26 February 2014, respectively, are added.

| Date                    | Height<br>km | $n_{CCN}$ Falcon | $n_{CCN}$ Lidar  | $n_{INP}$ Lidar | $n_{INP}$ Lidar | $n_{INP}$ Lidar |
|-------------------------|--------------|------------------|------------------|-----------------|-----------------|-----------------|
|                         |              | 0.2% ss          | 0.2% ss          | D15d –20°C      | D15d –25°C      | D15d –30°C      |
|                         |              | cm <sup>−3</sup> | cm <sup>−3</sup> | L <sup>−1</sup> | L <sup>−1</sup> | L <sup>−1</sup> |
| 22 June 2013            | 2 – 3        | 158±13           | 242±74           | 3±1             | 26±11           | 261±107         |
|                         | 3 – 3.6      | 88±6             | 144±21           | 1±1             | 9±2             | 87±16           |
| 10 July 2013            | 2 – 3        | 157±13           | 291±12           | 6±1             | 65±7            | 664±69          |
|                         | 3 – 4.4      | 100±5            | 189±22           | 3±1             | 29±4            | 299±43          |
| 11 July 2013            | 2 – 3        | 154±11           | 270±21           | 5±1             | 49±4            | 496±42          |
|                         | 3 – 4.4      | 107±7            | 196±18           | 3±1             | 30±4            | 306±40          |
| <b>26 February 2014</b> | 0.5 – 1.5    | –                | 166±67           | 0.004±0.002*    | 0.06±0.03*      | 0.9±0.4*        |
| 3 March 2014            | 2 – 3        | –                | 412±62           | 1±1             | 11±4            | 110±37          |

\* INP concentration calculated with McCluskey et al. (2018) for marine particles

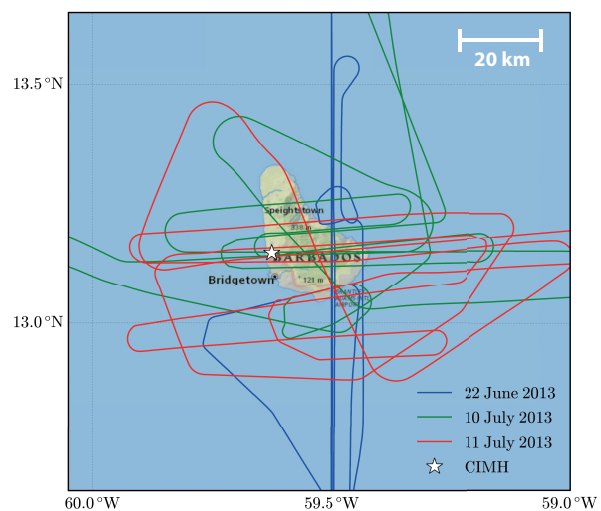

**Figure 1.** Falcon flight tracks in the Barbados region on 22 June, 10 July, and 11 July 2013. The white star marks the lidar site at the Caribbean Institute for Meteorology and Hydrology (CIMH) north of the capital Bridgetown. Falcon aircraft versus BERTHA lidar comparisons are based on the observations listed in Table 4.

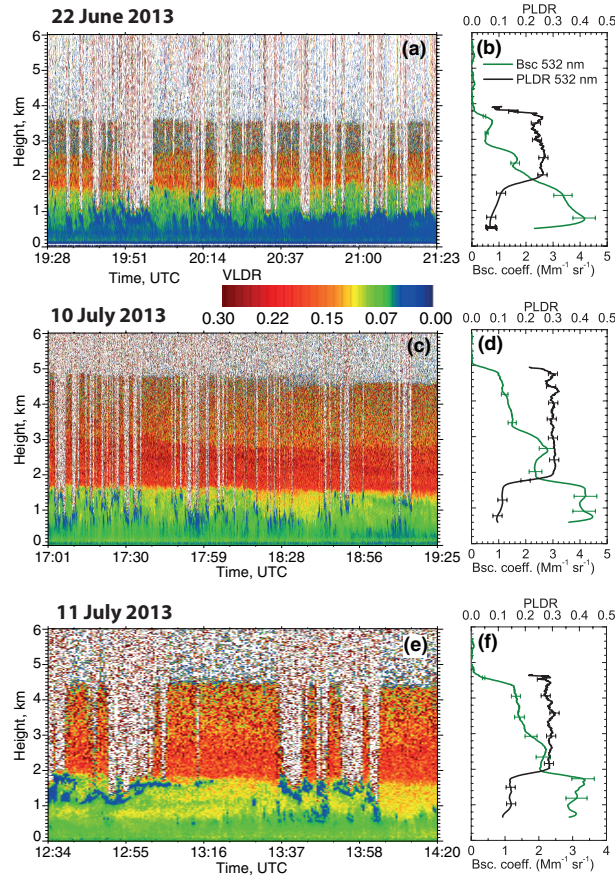

**Figure 2.** SALTRACE lidar observations of the Saharan air layer (SAL) above the marine boundary layer on 22 June (a-b), 10 July (c-d), and 11 July (e-f) 2013. Time-height displays of the **volume depolarization ratio** at 532 nm (left) and the corresponding cloud-screened mean profiles (right) of the particle backscatter coefficient (green line, lower x-axis) and particle linear depolarization ratio (black line, upper x-axis) at 532 nm are shown. Low-level trade wind cumuli (dark blue in a, c, e) strongly attenuated the laser light, indicated by the noise above the clouds. The strong increase of the depolarization ratio indicates the lower boundary of the SAL at approx. 1.8–2.0 km height. The top of the SAL was about 3.7 km (22 June), 5.0 km (10 July), and 4.5 km (11 July). Local time is UTC –4 h.

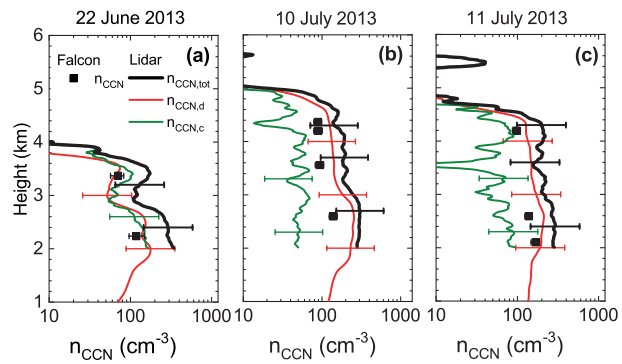

**Figure 3.** Lidar-derived CCN number concentrations at 0.2% supersaturation (black line) with contributions from dust (red line, critical dry diameter of 200 nm) and continental pollution aerosol (olive line, critical dry diameter of 100 nm) compared to coincident airborne in situ measurements (black dots) during SALTRACE-1. The error bars of the lidar profiles indicate an uncertainty of a factor of 2. **The error bars of the in situ measurements indicate the 16<sup>th</sup> and 84<sup>th</sup> percentile.**

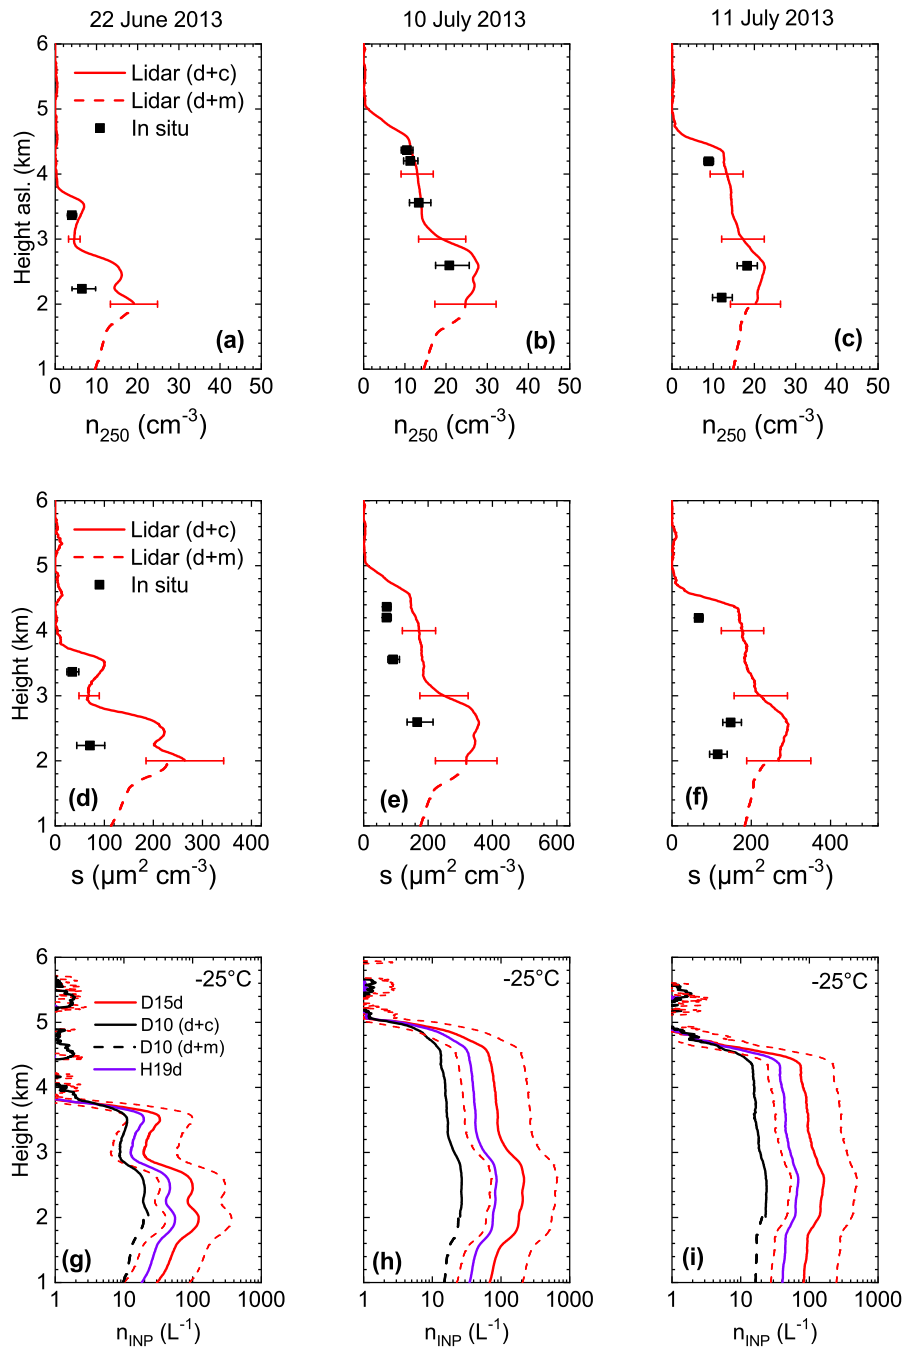

**Figure 4.** Number concentration  $n_{250}$  for particles with radius  $> 250$  nm (a–c) and surface area concentration  $s$  (d–f) measured on board the Falcon aircraft (black dots) and derived from the lidar measurements (red profiles, solid line – sum of dust and continental pollution particles (above 2 km), dashed line – sum of dust and marine particles (below 2 km)). The three SALTRACE case studies are shown: 22 June (left, a,d,g), 10 July (center, b,e,h), and 11 July 2013 (right, c,f,i). INP concentrations (g–i) are given at  $-25^{\circ}\text{C}$  for the immersion freezing parameterizations of **D10d+c** (input  $n_{250,d}+n_{250,c}$ , above approx. 2 km), **D10d+m** (input  $n_{250,d}+n_{250,m}$ , below approx. 2 km), **D15d** (input  $n_{250,d}$ ), and **H19d** (input  $s_d$ , see Tab. 2). **1% K-feldspar contribution was used for H19d.** The uncertainty in the lidar-derived  $n_{250}$  and  $s$  values is 30%. For the INP concentration an uncertainty of a factor 3 is indicated by the dashed lines for the D15d profile. **The error bars of the in situ measurements indicate the 16<sup>th</sup> and 84<sup>th</sup> percentile.**



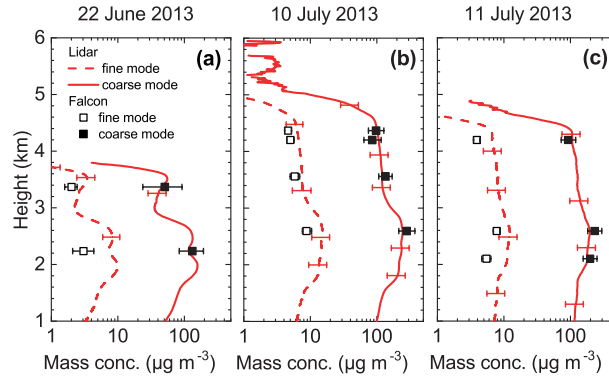

**Figure 5.** Mass concentration of fine mode ( $r < 500$  nm, dashed line) and coarse mode ( $r > 500$  nm, solid line) dust derived from airborne in situ measurements (black dots) and lidar observations (red profiles) for the three SALTRACE-1 days. **The error bars of the in situ measurements indicate the 16<sup>th</sup> and 84<sup>th</sup> percentile.**

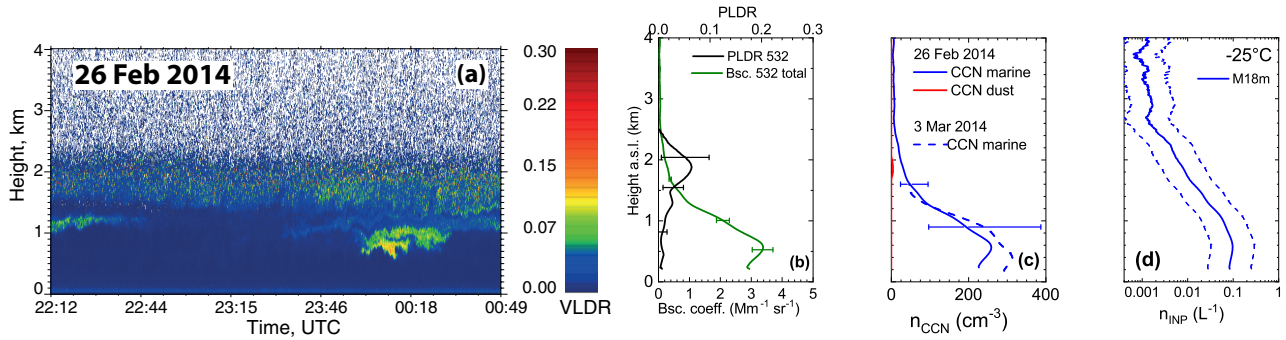

**Figure 6.** Pristine marine observation during the SALTRACE winter campaign on 26 February 2014, 22:12–00:49 UTC. (a) Time-height display of the 1064 nm volume depolarization ratio, (b) particle backscatter coefficient (green line) and particle linear depolarization ratio (black line) at 532 nm, (c) CCN number concentrations at water supersaturation of 0.2%, (d) immersion freezing INP concentrations at  $-25^{\circ}\text{C}$  for M18-marine. The dashed line indicates the uncertainty range (factor 3) of the INP parameterization.

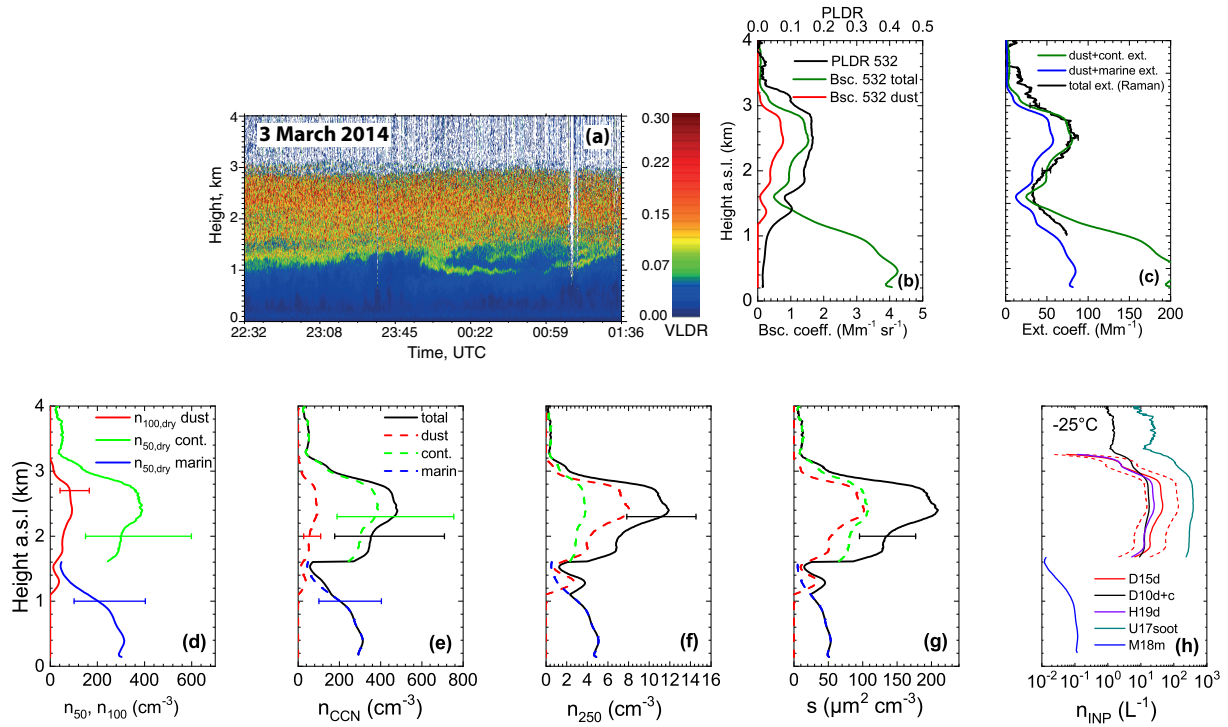

**Figure 7.** Dust–smoke mixture observed during the SALTRACE winter campaign on 3 March 2014, 22:30–23:20 UTC. (a) Time–height display of the 1064 nm **volume linear depolarization ratio (VLDR)** (only the first 40 min are averaged for the profiles in b–h), (b) particle backscatter coefficient (green line) including its dust contribution (red line) and particle linear depolarization ratio (black line) at 532 nm, (c) sum of dust and continental pollution extinction coefficient (green line) using a smoke lidar ratio of 50 sr and sum of dust and marine particles extinction coefficient (blue line) using a marine lidar ratio of 20 sr compared to the total extinction coefficient (black line) independently measured with BERTHA (Raman lidar method). Above the height of 1.6 km a dust–smoke mixture fits best, below the dust–marine mixture (with a small contribution of smoke or pollution) agrees better with the Raman extinction solution. (d) Number concentration  $n_{100,d}$  for dust (red),  $n_{50,c}$  for smoke (green),  $n_{50,m}$  for marine particles (blue), (e) CCN number concentrations at water supersaturation of 0.2% for the 3 components and the total CCN concentration (black line) above 1.6 km for dust–smoke, below for dust–marine, (f)  $n_{250}$  values (colors as before), (g) surface area concentration (colors as before), (h) immersion freezing INP concentrations at  $-25^{\circ}\text{C}$  for **D10-cont+dust**, **D15-dust**, **H19-dust**, **M18-marine** and **U17-soot**. For the INP concentration an uncertainty of a factor 3 is indicated as dashed lines for the D15d profile.

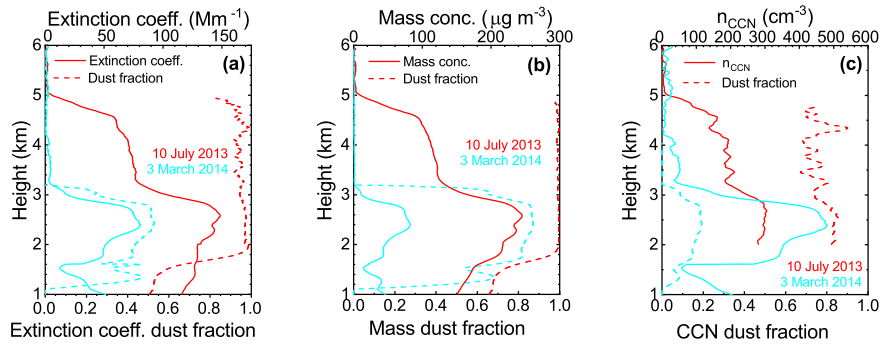

**Figure 8.** Summer (10 July 2013, red) versus winter (3 March 2014, cyan) aerosol conditions in the SAL. (a) total particle extinction coefficient (solid line) and relative dust contribution to the total particle extinction coefficient (dashed line), (b) same as (a) except for dust mass concentration, (c) same as (a) except for CCN concentration.
